1 **Title:** Global diversity and biogeography of the *Zostera marina* mycobiome

2

3 **Authors:** Cassandra L. Ettinger<sup>1,2</sup>, Laura E. Vann<sup>1,2,3</sup>, Jonathan A. Eisen<sup>1,2,4</sup>

4

5 <sup>1</sup>Genome Center, University of California, Davis, CA, United States

6 <sup>2</sup>Department of Evolution and Ecology, University of California, Davis, CA, United States

7 <sup>3</sup>Department of Genomics and Bioinformatics, Novozymes, Davis, CA United States

8 <sup>4</sup>Department of Medical Microbiology and Immunology, University of California, Davis, Davis,  
9 CA, United States

10

11 **Corresponding Author:**

12 Cassandra L. Ettinger

13 Email address: [clettinger@ucdavis.edu](mailto:clettinger@ucdavis.edu)

14

15 **Keywords:** seagrasses, *Zostera marina*, marine fungi, microbial eukaryotes, 18S rRNA, ITS2,  
16 eelgrass, mycobiome, core, abundance-occupancy, dispersal-limited, plant-selected, global  
17 distribution

18

19

20

21

22

23

24

25

26

27

28

29

30

31

32

33

34

35

36

37

38

39

40

41

42

43

44

45 **Abstract**

46

47 Seagrasses are marine flowering plants that provide critical ecosystem services in coastal  
48 environments worldwide. Marine fungi are often overlooked in microbiome and seagrass  
49 studies, despite terrestrial fungi having critical functional roles as decomposers, pathogens or  
50 endophytes in global ecosystems. Here we characterize the distribution of fungi associated with  
51 the seagrass, *Zostera marina*, using leaves, roots, and rhizosphere sediment from 16 locations  
52 across its full biogeographic range. Using high throughput sequencing of the ribosomal internal  
53 transcribed spacer (ITS) region and 18S ribosomal RNA gene, we first measured fungal  
54 community composition and diversity, then we tested hypotheses of neutral community  
55 assembly theory and the degree to which deviations suggested amplicon sequence variants  
56 (ASVs) were plant-selected or dispersal-limited, and finally we identified a core mycobiome and  
57 investigated the global distribution of differentially abundant ASVs. Our results show that the  
58 fungal community is significantly different between sites and follows a weak, but significant  
59 pattern of distance decay. Generally, there was evidence for both deterministic and stochastic  
60 factors contributing to community assembly of the mycobiome. The *Z. marina* core leaf and root  
61 mycobiomes are dominated by unclassified Sordariomycetes spp., unclassified Chytridiomycota  
62 lineages (including Lobulomycetaceae spp.), unclassified Capnodiales spp. and  
63 *Saccharomyces* sp. A few ASVs (e.g. *Lobulomyces* sp.) appear restricted to one or a handful of  
64 locations (e.g. possibly due to local adaptation, deterministic dispersal limitation or seasonal  
65 bloom events), while others (e.g. *Saccharomyces* sp.) are more ubiquitous across all locations  
66 suggesting a true global distribution and possible plant-selection. Fungal guilds associated with  
67 *Z. marina* were only weakly identified (10.12% of ITS region and 3.4% 18S rRNA gene ASV  
68 guild assignments were considered highly probable) including wood saprotrophs,  
69 ectomycorrhizal fungi, endophytic fungi and plant pathogens. Our results are similar to those  
70 found for other seagrass species. It is clear from the many unclassified fungal ASVs and fungal

71 functional guilds, that our knowledge of marine fungi is still rudimentary. Further studies  
72 characterizing seagrass-associated fungi are needed to understand the roles of these  
73 microorganisms generally and when associated with seagrasses.

74

75

76

77

78

79

80

81

82

83

84

85

86

87

88

89

90

91

92

93

94

95

96

97 **Introduction**

98

99 Terrestrial fungi are known to have critical ecological roles as microbial saprotrophs, pathogens  
100 and mutualists (Peay *et al.*, 2016), and although less is known about fungi in aquatic  
101 ecosystems, it is believed that they also have vital ecological roles (e.g. in organic matter  
102 degradation, nutrient cycling and food web dynamics (Kagami *et al.*, 2007; Gutiérrez *et al.*,  
103 2011; Orsi *et al.*, 2013; Grossart *et al.*, 2016, 2019; Raghukumar, 2017)). Despite their global  
104 importance, the taxonomic, phylogenetic, and functional diversity of marine fungi generally is  
105 vastly understudied (Amend *et al.*, 2019). In comparison to the greater than 120,000 terrestrial  
106 fungal species known (Hawksworth & Lücking, 2017), there are currently only ~1,692 described  
107 species of marine fungi, though estimates of the true diversity of these organisms is much  
108 higher (Jones, 2011; Jones *et al.*, 2015, 2019). Recent studies have examined the global  
109 distribution of marine planktonic, pelagic, and benthic fungi (Tisthammer *et al.*, 2016; Morales *et*  
110 *al.*, 2019; Hassett *et al.*, 2020), yet the distribution of host-associated fungi in the marine  
111 environment is still relatively unknown. Fungi have been reported in association with many  
112 marine animals including sponges (Gao *et al.*, 2008), corals (Littman *et al.*, 2011) and other  
113 invertebrates (Yarden, 2014), with algae and seaweeds (Zuccaro *et al.*, 2008; Gnani *et al.*,  
114 2017), and flowering plants, like seagrasses (Borovec & Vohník, 2018).

115 Seagrasses are foundation species in coastal ecosystems worldwide and are the only  
116 submerged angiosperms (flowering plants) to inhabit the marine environment. One widespread  
117 seagrass species, *Zostera marina*, also known as eelgrass, provides critical ecosystem services  
118 in coastal environments throughout much of the Northern Hemisphere (Hemminga & Duarte,  
119 2000; Orth *et al.*, 2006; Fourqurean *et al.*, 2012). Previous studies have investigated the  
120 composition and structure of the bacterial community associated with *Z. marina*, including a  
121 global survey that was able to identify a core eelgrass root microbiome (Ettinger *et al.*, 2017a;  
122 Fahimipour *et al.*, 2017; Bengtsson *et al.*, 2017). Members of this community are thought to  
123 facilitate nitrogen and sulfur cycling for host plant benefit (Capone, 1982; Sun *et al.*, 2015; Cúcio  
124 *et al.*, 2016; Ettinger *et al.*, 2017a,b; Fahimipour *et al.*, 2017; Crump *et al.*, 2018; Wang *et al.*,  
125 2020).

126 Comparatively, not as much is known about the distribution, diversity, and function of the  
127 mycobiome (i.e. the fungal community) associated with *Z. marina*. Culture-based studies have  
128 described a mycobiome composed of taxa in the classes Eurotiomycetes, Dothideomycetes,  
129 and Sordariomycetes (Shoemaker & Wyllie-Echeverria, 2013; Kirichuk & Pivkin, 2015; Petersen  
130 *et al.*, 2019; Ettinger & Eisen, 2020). These studies consistently find dominance of a few  
131 ubiquitous taxa (e.g. *Cladosporium* sp.) but also a diverse set of rare taxa that vary among sites  
132 and may be endemic to specific locations (e.g. *Colletotrichum* sp.) (Ettinger & Eisen, 2020). This  
133 pattern is suggestive of neutral community assembly through stochastic processes.

134

135 While culture-independent studies of *Z. marina* and other seagrass species have more  
136 exhaustively characterized the taxonomic diversity of these fungal communities, they have also  
137 highlighted how little is known about factors affecting the distribution, function and community  
138 assembly of seagrass-associated fungi (Wainwright *et al.*, 2018, 2019b; Hurtado-McCormick *et*  
139 *al.*, 2019; Ettinger & Eisen, 2019; Trevathan-Tackett *et al.*, 2020). A common finding among  
140 these studies is that taxonomic assignments cannot be made for greater than two-thirds of the  
141 fungal sequences associated with seagrasses and that Chytridiomycota lineages are dominant  
142 in this ecosystem (Wainwright *et al.*, 2019b; Ettinger & Eisen, 2019; Trevathan-Tackett *et al.*,  
143 2020). Our culture-independent understanding of the mycobiome of *Z. marina* has so far  
144 focused on a single location in Bodega Bay, CA (Ettinger & Eisen, 2019). However, site-to-site  
145 variation in the mycobiome has now been observed in mycobiome studies from several other  
146 seagrass species (Wainwright *et al.*, 2018, 2019b; Hurtado-McCormick *et al.*, 2019; Trevathan-  
147 Tackett *et al.*, 2020) For example, a distance-decay relationship was found for the fungal  
148 community associated with the seagrass, *Enhalus acoroides*, in Singapore and Peninsular  
149 Malaysia (Wainwright *et al.*, 2019b), and for the seagrass, *Syringodium isoetifolium*, along  
150 Wallace's line (Wainwright *et al.*, 2018). Additionally, the global planktonic marine fungal  
151 community was found to cluster by ocean (Hassett *et al.*, 2020), thus we might expect in our  
152 study, in addition to a distance-decay relationship, that we might see differentiation by ocean  
153 basin. Such geographic relationships are suggestive of niche-based community assembly  
154 through deterministic processes such as environmental filtering.

155 One concept central to our investigation here is the role of stochastic and deterministic drivers in  
156 determining the community assembly of the seagrass mycobiome. The Sloan neutral model has  
157 been widely applied to assess community assembly dynamics for microbial communities (Sloan  
158 *et al.*, 2007; Burns *et al.*, 2016). The assumption of this model is that random immigrations,  
159 births, and deaths can determine the relative abundance of taxa in a community (Sloan *et al.*,

160 2007). The model further assumes that local communities are assembled stochastically from  
161 regional pools, and that deterministic competitive interactions are not important in shaping the  
162 community because species are competitively equivalent (Chave, 2004; Rosindell *et al.*, 2011;  
163 Schmidt *et al.*, 2015). Stochastic processes supporting the neutral model include priority effects  
164 and ecological drift, while deterministic processes include species traits, interspecies  
165 interactions (e.g. competition, mutualisms) and environmental conditions (Zhou & Ning, 2017).  
166 Dispersal limitation can be either a stochastic or deterministic process (Lowe & McPeck, 2014).  
167 Identifying specific taxa that deviate from the model allows us to identify taxa that are  
168 assembled through deterministic processes including plant selection (Shade & Stopnisek,  
169 2019).

170  
171 Here we use high-throughput sequencing of marker genes to (1) characterize the fungal  
172 community associated with the seagrass, *Zostera marina*, globally and assess whether a  
173 distance-decay relationship is present between *Z. marina* and its mycobiome, (2) define a global  
174 core fungal community and assess community assembly dynamics using neutral models  
175 coupled with differential abundance analysis to predict important fungal taxa and evaluate their  
176 global distribution, and (3) assign functional predictions for the fungal community associated  
177 with *Z. marina*.

## 178 **Methods**

### 179 180 *Sample collection*

181  
182 Samples were collected from 16 different globally distributed sites by researchers in the *Zostera*  
183 Experimental Network (ZEN) (Table S1) (Duffy *et al.*, 2015). Samples were collected subtidally  
184 at ~1 m depth using a modified version of the collection protocol previously used in Fahimipour  
185 *et al.* (2017). At each of the 16 sites, leaves and roots from individual *Z. marina* plants and

186 adjacent sediment were collected for 12 individuals resulting in a total of 576 samples ( $n_{\text{leaf}} =$   
187 192,  $n_{\text{root}} = 192$ ,  $n_{\text{sediment}} = 192$ ).

188

189 To obtain *Z. marina* leaf and root tissues for analysis here, researchers were instructed to (1)  
190 gently remove individual *Z. marina* plants from the sediment, (2) briefly swish the individual in  
191 nearby seawater to remove loosely associated sediment from the roots, (3) collect ~5 roots and  
192 fully submerge in a pre-labelled 2 mL microcentrifuge tube filled with DNA/RNA Shield (Zymo  
193 Research, Inc, Irvine, CA, United States), and (4) collect a 2 cm section of healthy green leaf  
194 tissue and fully submerge in a pre-labelled 2 mL microcentrifuge tube filled with DNA/RNA  
195 Shield. A sample of sediment was taken adjacent to each *Z. marina* individual from 1 cm under  
196 the sediment surface using a 6CC syringe. Briefly this was performed by (1) removing the  
197 plunger from the syringe, (2) inserting the barrel of the syringe into the sediment, (3) inserting  
198 the syringe plunger to form an airtight seal, (4) removing the syringe from sediment, (5)  
199 extruding the sediment until the base of the syringe plunger is at the 3CC mark, and (6) using  
200 an alcohol sterilized plastic spatula to transfer ~0.25 g of sediment into a pre-labelled 2 mL  
201 microcentrifuge tube filled with DNA/RNA Shield. Samples were preserved in DNA/RNA Shield  
202 as it stabilizes DNA/RNA at room temperature. All samples were processed in the field  
203 immediately or within 5 hours of collection. Samples subsequently were kept at room  
204 temperature and mailed to the University of California, Davis within two weeks of sample  
205 collection.

206

### 207 *Molecular methods*

208

209 Samples were shipped from UC Davis to Zymo Research, Inc. for DNA extraction. Samples  
210 were transferred to 96-well plate format, with plates including both positive (ZymoBIOMICS  
211 Microbial Community standard) and negative (no input) controls. DNA was extracted from



212 samples using the ZymoBIOMICS DNA Miniprep kit following the manufacturer's protocol with  
213 minor modifications as follows. Prior to DNA extraction, samples were heated at 65 °C for 5  
214 minutes to resuspend any white precipitate that had accumulated. Sediment samples were  
215 vortexed for 30 seconds to ensure homogenization and then using a flame-sterilized spatula  
216 transferred into ZR BashingBead Lysis tubes until tubes were two-thirds full. Leaf and root  
217 samples were vortexed 30 seconds to dissociate any epiphytes and then all the liquid was  
218 transferred into ZR BashingBead Lysis tubes. For step 1, ZymoBIOMICS Lysis solution was  
219 then added to samples such that the final volume was ~1 mL. For step 2, samples were then  
220 subjected to a bead beater on the "homogenize" setting speed for 5 minutes. For step 4, 600 uL  
221 of supernatant was transferred to the filter tube. For step 11, only 50 uL of DNase/RNase free  
222 water was used for DNA elution. DNA concentrations for controls and a subset of samples per  
223 plate were first quantified with a Nanodrop (Thermo Fisher Scientific, Waltham, MA, United  
224 States), and subsequently all samples were quantified using Quant-iT PicoGreen (Thermo  
225 Fisher Scientific, Waltham, MA, United States). DNA was then shipped directly to the U.S.  
226 Department of Energy Joint Genome Institute (JGI) for amplicon sequencing.

227

### 228 *Sequence generation*

229

230 The ribosomal internal transcribed spacer 2 (ITS2) region was amplified via polymerase chain  
231 reaction (PCR) using the ITS9F and ITS4R primer set (White *et al.*, 1990; Menkis *et al.*, 2012)  
232 and the 18S ribosomal RNA gene was amplified via PCR using the 565F and 948R primer set  
233 (Stoeck *et al.*, 2010). Libraries were prepared according to the JGI's iTag library construction  
234 standard operating protocol (SOP) v.1.0 ([https://1ofdmq2n8tc36m6i46scovo2e-  
235 wpengine.netdna-ssl.com/wp-content/uploads/2019/07/iTag-Sample-Preparation-for-Illumina-  
236 Sequencing-SOP-v1.0.pdf](https://1ofdmq2n8tc36m6i46scovo2e-wpengine.netdna-ssl.com/wp-content/uploads/2019/07/iTag-Sample-Preparation-for-Illumina-Sequencing-SOP-v1.0.pdf)). We briefly summarize their protocol here. Three replicate PCR  
237 reactions for each sample were performed in 96-well plate format with the following conditions:

238 94 °C for 3 min, 35 cycles at 94 °C for 25 sec, 50 °C for 60 sec, 72 °C for 90 sec, and a final  
239 extension at 72 °C for 10 min. After amplification, replicate PCR products were combined and  
240 then samples were pooled together based on DNA quantification of combined PCR replicates.  
241 Samples were then pooled at up to 184 samples per sequencing run and sequenced on an  
242 Illumina MiSeq (Illumina, Inc., San Diego, CA, United States) in 2x300 bp run mode. Resulting  
243 sequence data was demultiplexed by the JGI and processed through JGI's quality-control  
244 system which filters out known contaminant reads using the kmer filter in bbdduk and also  
245 removes adaptor sequences ([https://jgi.doe.gov/wp-content/uploads/2013/05/iTagger-](https://jgi.doe.gov/wp-content/uploads/2013/05/iTagger-methods.pdf)  
246 [methods.pdf](https://jgi.doe.gov/wp-content/uploads/2013/05/iTagger-methods.pdf)). The quality-controlled sequence read files were downloaded and used for  
247 downstream analysis.

248  
249 The JGI iTag SOP does not include the sequencing of negative controls or blanks. The JGI  
250 quality-controlled sequence reads generated for the ITS2 region were deposited at GenBank  
251 under BioProject ID [PRJNA667465](https://www.ncbi.nlm.nih.gov/bioproject/PRJNA667465) and for the 18S rRNA gene at [PRJNA667462](https://www.ncbi.nlm.nih.gov/bioproject/PRJNA667462). Sequence  
252 reads are also available from the JGI Genome Portal  
253 (<https://genome.jgi.doe.gov/portal/Popandseaspecies/Popandseaspecies.info.html>).

254  
255 *Sequence processing*

256  
257 Primers were removed using cutadapt (v. 2.1) (Martin, 2011). The resulting fastq files were  
258 analyzed in R (v. 4.0.2) using DADA2 (v. 1.12.1), phyloseq (v. 1.32.0), vegan (v. 2.5-6),  
259 microbiome (v. 1.10.0), ecodist (v. 2.0.5), EcoUtils (v. 0.1), DESeq2 (v. 1.28.1), ggplot2 (v.  
260 3.3.2), tidyverse (v. 1.3.0) and many other R packages (Lahti & Shetty; Hothorn *et al.*, 2006,  
261 2008; Dray & Dufour, 2007; Goslee & Urban, 2007; Wickham, 2007, 2016; Sarkar, 2008;  
262 Morgan *et al.*, 2009; Zeileis & Croissant, 2010; Eddelbuettel, 2013; Lawrence *et al.*, 2013;  
263 McMurdie & Holmes, 2013; Love *et al.*, 2014; Neuwirth, 2014; Xie, 2014; Huber *et al.*, 2015;

264 Ritchie *et al.*, 2015; Callahan *et al.*, 2016; Elzhov *et al.*, 2016; Baselga *et al.*, 2018; Becker,  
265 2018; Chen, 2018; Garnier, 2018; Hijmans, 2019; Oksanen *et al.*, 2019; Simpson, 2019;  
266 Wickham *et al.*, 2019; Allaire *et al.*, 2020; Bass *et al.*, 2020; Harrell *et al.*, 2020; Ogle *et al.*,  
267 2020; Pedersen, 2020; Robinson & Hayes, 2020; Salazar, 2020; Sprockett, 2020; Therneau,  
268 2020; Wickham & Seidel, 2020; Yu, 2020). For a detailed walkthrough of the following analysis  
269 using R, see the R-markdown summary file (Ettinger, 2020).

270

271 Prior to denoising in DADA2, reads were truncated at the first quality score of 2 and reads with  
272 an expected error greater than 2 were removed. Reads were then denoised and merged to  
273 generate tables of amplicon sequence variants (ASVs) using DADA2. Prior to downstream  
274 analyses, chimeric sequences were identified and removed from tables using  
275 `removeBimeraDenovo` (12.62% of sequences for ITS2 region, 4.53% of sequences for 18S  
276 rRNA gene). Taxonomy was inferred using the RDP Naive Bayesian Classifier algorithm with a  
277 modified UNITE (v. 8.2 “all eukaryotes”) database for ITS2 region sequences and the SILVA (v.  
278 138) database for 18S rRNA gene sequences resulting in 89,754 and 53,084 ASVs respectively  
279 (Wang *et al.*, 2007; Quast *et al.*, 2013; Yilmaz *et al.*, 2014; Abarenkov *et al.*, 2020). The UNITE  
280 database was modified to include a representative ITS2 region amplicon sequence for the host  
281 plant, *Z. marina* (KM051458.1) as was done previously in Ettinger and Eisen (2019). ASVs were  
282 then each given a unique name by giving each a number preceded by “ITS” or “18S” and then  
283 “SV” which stands for sequence variant (e.g., ITS\_SV1, ITS\_SV2, etc. and 18S\_SV1, 18S\_SV2,  
284 etc.).

285

286 Based on the results of Pauvert *et al.* (2019), ITS-x was not run on the ITS2 region ASVs.  
287 However, we removed all ASVs taxonomically assigned as non-fungal at the domain level (e.g.,  
288 ASVs assigned to the host plant, *Z. marina*, other eukaryotic groups or with no domain level  
289 classification) from the ITS2 region ASV table prior to downstream analysis resulting in a final

290 table of 5,089 ASVs representing 488 samples ( $n_{\text{leaf}} = 179$ ,  $n_{\text{root}} = 173$ ,  $n_{\text{sediment}} = 136$ ). A total of  
291 88 samples were dropped from the analysis either because they had no sequences after being  
292 processed through DADA2 or no remaining sequences after removing non-fungal ASVs.

293

294 For the 18S rRNA gene ASV table, we generated two different filtered datasets (1) a fungal only  
295 dataset and (2) a general eukaryotic dataset. For (1), we removed all non-fungal ASVs from the  
296 18S rRNA gene ASV table prior to downstream analysis of the fungi in this dataset resulting in a  
297 table of 1,216 fungal ASVs representing 409 samples ( $n_{\text{leaf}} = 146$ ,  $n_{\text{root}} = 144$ ,  $n_{\text{sediment}} = 119$ ). A  
298 total of 167 samples were dropped from the analysis either because they had no sequences  
299 after being processed through DADA2 or because they had no remaining sequences after  
300 removing all ASVs classified as non-fungal. For (2), we removed ASVs taxonomically classified  
301 as non-eukaryotic and also as being from embryophytes (e.g. *Z. marina*) from the 18S rRNA  
302 gene ASV table resulting in a table of 36,582 eukaryotic ASVs representing 556 samples ( $n_{\text{leaf}} =$   
303  $187$ ,  $n_{\text{root}} = 187$ ,  $n_{\text{sediment}} = 182$ ). A total of 20 samples were dropped from the analysis either  
304 because they had no sequences after being processed through DADA2 or no remaining  
305 sequences after filtering ASVs.

306

307 *Sequence analysis and visualization*

308

309 We utilized raw read counts, proportions, centered log-ratio, or Hellinger transformations on the  
310 data as appropriate when performing statistics and generating visualizations. Centered log-ratio  
311 and Hellinger transformations were performed using the transform function in the microbiome R  
312 package. Centered log-ratio (clr) values are scale-invariant such that the same ratio is obtained  
313 regardless of differences in read counts and thus were suggested as appropriate  
314 transformations for microbiome analysis by Gloor et al. (2017). When calculating abundance-  
315 occupancy curves, we used `rarefy_even_depth` in the phyloseq R package to subset to 1000

316 and 100 reads without replacement respectively for the ITS2 region and 18S ASV tables  
317 following the code in Shade and Stopnisek (2019).

318

319 To assess alpha (i.e. within sample) diversity between sample types (leaf, root, and sediment),  
320 the Shannon index of samples were calculated on ASV tables containing raw read counts using  
321 the `estimate_richness` function in the phyloseq R package. Raw read counts were used instead  
322 of normalizing the data by rarefying, as this kind of subsampling has been shown to be  
323 statistically inappropriate (McMurdie & Holmes, 2014). To assess alpha diversity across each of  
324 the 16 collection sites (Table S1) and across oceans, we first split the dataset into different  
325 sample types (leaf, root, and sediment) and then for each sample type, we calculated the  
326 Shannon index of samples. Kruskal–Wallis tests with 9,999 permutations were used to test for  
327 significant differences in alpha diversity across comparisons (sample type, site or ocean). For  
328 comparisons in which the Kruskal–Wallis test resulted in a rejected null hypothesis ( $p < 0.05$ ),  
329 Bonferroni corrected *post hoc* Dunn tests were performed.

330 To assess beta (i.e. between-sample) diversity, we calculated several ecological metrics (Bray-  
331 Curtis, Aitchinson, Hellinger) using the `ordinate` function in phyloseq and visualized them using  
332 principal coordinates analysis. The Bray-Curtis dissimilarity is a widely used ecological metric in  
333 microbial analyses which calculates the compositional dissimilarity between samples (Bray *et*  
334 *al.*, 1957). The Aitchison distance, which is the Euclidean distance of clr transformed samples,  
335 is thought to be better than Bray-Curtis dissimilarity, because it is more stable to subsetting the  
336 data, and is also a true linear distance (Aitchison *et al.*, 2000; Gloor *et al.*, 2017). The Hellinger  
337 distance, which is the Euclidean distance of Hellinger transformed data, is based on differences  
338 in the proportions of taxa and is thought to be a more ecologically relevant representation of the  
339 composition of taxa between samples in comparison to Bray-Curtis dissimilarity which is biased  
340 towards abundant taxa (Rao, 1997; Legendre & Gallagher, 2001).

341

342 To test for significant differences in mean centroids between categories of interest (i.e. sample  
343 type, site, ocean) for each ecological metric (Bray-Curtis, Aitchinson, Hellinger), we performed  
344 permutational manovas (PERMANOVAs) with 9,999 permutations and to account for multiple  
345 comparisons, we adjusted  $p$ -values using the Bonferroni correction (Anderson, 2001). We also  
346 tested for significant differences in mean dispersions between different categories of interest  
347 using the betadisper and permutest functions from the vegan package in R with 9,999  
348 permutations. The *post hoc* Tukey's honest significant difference (HSD) test was performed on  
349 betadisper results that resulted in a rejected null hypothesis ( $p < 0.05$ ), to identify which  
350 categories had mean dispersions that were significantly different.

351

352 To test for correlations between the community distances (Bray-Curtis, Hellinger) and  
353 geographic distances between samples, we first subset the data by ocean and sample type and  
354 then calculated the geographical distances between samples using the Haversine formula which  
355 accounts for the spherical nature of Earth using the distm function in the geosphere R package.  
356 Then we performed Mantel tests using 9,999 permutations and generated Mantel correlograms  
357 using the mantel and mantel.correlog functions in the vegan R package. To further support  
358 Mantel test results, we performed multiple regression on distance matrices (MRM) between  
359 community distances and geographic distances using 9,999 permutations via the MRM function  
360 in the ecodist R package. The code to perform distance-decay analyses was adapted from  
361 Wainwright et al (2019b).

362

363 To visualize global fungal community composition across sample types (leaf, root, and  
364 sediment), we transformed raw read counts to proportions and collapsed ASVs into taxonomic  
365 orders using the tax\_glom function in phyloseq and then removed orders with a mean proportion  
366 of less than one percent. This threshold was chosen to better visualize only the most abundant

367 orders, while also removing rare orders to avoid possible false positives during statistical  
368 analysis. The average relative abundance of taxonomic orders was compared between sample  
369 types using Bonferroni corrected Kruskal–Wallis tests in R and Bonferroni corrected *post hoc*  
370 Dunn tests were performed for orders where the Kruskal–Wallis test resulted in a rejected null  
371 hypothesis, to identify which sample type comparisons for each taxonomic order were  
372 significantly different.

373 To examine the contribution of specific ASVs to fungal community composition, we used the  
374 DESeq2 R package on the raw read counts to examine the log<sub>2</sub>fold change (differential  
375 abundance) of ASVs across sample types (leaf, root, sediment) in both datasets. We then  
376 visualized the global distribution of ASVs found to have significantly different differential  
377 abundances (Bonferroni corrected  $p < 0.05$ ). To do this, we transformed the raw read counts to  
378 proportions and then subset each dataset to only include the single ASV of interest using  
379 `prune_taxa` in the `phyloseq` R package.

380

381 A core microbial community is usually defined as taxa that occur above an arbitrary detection  
382 threshold (e.g. greater than 1% relative abundance) and also above an arbitrary occupancy  
383 threshold (e.g. from 30% in Ainsworth et al. (2015) to 95% in Huse et al. (2012)). In an attempt  
384 to define “common” core leaf, root and sediment mycobiomes (“common” as defined in Risely  
385 (2020)), we used a more standardized approach by building abundance-occupancy curves and  
386 then calculating the rank contribution of specific ASVs to beta diversity (Bray-Curtis) to identify  
387 putative core ASVs using code from Shade and Stopnisek (2019). ASVs were predicted to be in  
388 the core using the final percent increase in beta-diversity method described in Shade and  
389 Stopnisek (2019) with a final percent increase of equal or greater than 10%. We then fit the  
390 Sloan neutral model (Sloan *et al.*, 2007) to the abundance-occupancy curves using the code

391 provided in Burns et al. (2016) to predict whether core taxa were selected for by the  
392 environment (e.g. by the host plant, *Z. marina*), dispersal-limited or neutrally selected.

393

394 To investigate the general composition of the eukaryotic community and assess what proportion  
395 of the eukaryotic community is taxonomically classified as fungal, we first transformed raw read  
396 counts from the 18S rRNA gene ASV table filtered to include all eukaryotes to proportions and  
397 collapsed ASVs into taxonomic phyla using the `tax_glom` function in `phyloseq`. For visualization  
398 purposes, we then removed phyla with a mean proportion of less than 0.1 percent. The average  
399 relative abundance of eukaryotic phyla was then calculated for each sample type (leaf, root,  
400 sediment).

401

402 To investigate possible functional roles of seagrass-associated fungi, FUNGuild (v. 1.1) was run  
403 on the taxonomic assignments of ASVs from both the ITS2 region and 18S rRNA gene datasets  
404 (Nguyen *et al.*, 2016). FUNGuild searches the taxonomic assignments at the genus level  
405 against an online Guilds database containing taxonomic keywords and functional metadata (e.g.  
406 trophic level, guild, etc.) and FUNGuild assignments are given confidence rankings of "Highly  
407 Probable", "Probable" or "Possible". To assess ecological guilds of high confidence, we first  
408 visualized all annotations that were ranked as "highly probable" in either dataset. We then  
409 investigated functional guilds that were assigned to only highly abundant ASVs in our data. To  
410 assess this, we subset both the ITS2 region and 18S rRNA gene ASV tables to include only  
411 ASVs with a mean abundance of greater than 0.1 percent and then visualized the data in R.

412

## 413 **Results**

414

### 415 **Fungal alpha diversity differs between sites, tissues and oceans**

416



417 The Shannon index was significantly different between sample types (K-W test,  $p < 0.001$ ,  
418 Figure 1) for both the ITS2 region amplicon and 18S rRNA gene amplicon datasets. *Post hoc*  
419 Dunn tests of both datasets suggest that alpha diversity for leaves was consistently lower than  
420 that of the roots ( $p < 0.05$ ). However, there were conflicting results for the sediment, with  
421 diversity being lower in the sediment than leaves and roots in the ITS2 region amplicons ( $p <$   
422  $0.05$ ) and diversity being higher in the sediment than leaves and roots in the 18S rRNA gene  
423 amplicons ( $p < 0.05$ ). Alpha diversity for both datasets also was significantly different within  
424 each sample type across sites (K-W test,  $p < 0.001$ , Figure S1). This was driven by diversity  
425 being significantly different across some, but not all sites (Dunn,  $p < 0.05$ ). Alpha diversity for  
426 leaves was significantly different across oceans for the ITS2 region amplicon dataset (K-W test,  
427  $p = 0.0142$ ), but was not significantly different for roots or sediment between oceans or for  
428 leaves, roots or sediment between oceans for the 18S rRNA gene amplicon dataset ( $p > 0.05$ ).

429

### 430 **Fungal community structure differs across sites, tissues and oceans**

431

432 Similar to alpha diversity, fungal beta diversity was significantly different for both datasets using  
433 all three ecological metrics (Bray-Curtis, Aitchinson, Hellinger) across sample types  
434 (PERMANOVA,  $p < 0.001$ , Figure 2), across sites ( $p < 0.001$ , Figure S2) and across oceans ( $p$   
435  $< 0.001$ , Figure S2). *Post hoc* pair-wise PERMANOVA tests using the ITS2 region amplicon  
436 data indicated significant differences in beta diversity across sample types ( $p < 0.001$ ) and sites  
437 ( $p < 0.01$ ). These results were generally consistent with the 18S rRNA gene sequence data  
438 which supported differences in community structure across sample types ( $p < 0.001$ ) and across  
439 most, but not all, collection sites ( $p < 0.05$ ).

440

441 Within group variance (i.e. dispersion) also differed significantly for the ITS2 region amplicon  
442 data using all three beta diversity metrics across sample types (betadisper,  $p < 0.01$ ) and sites

443 ( $p < 0.01$ ), but did not vary across oceans ( $p > 0.05$ ). Mean dispersion between sites in the 18S  
444 rRNA gene data was not significant for two of the ecological metrics (Bray-Curtis:  $p = 0.79$ ,  
445 Hellinger:  $p = 1$ ) and similarly the mean dispersion between oceans was not significant for two  
446 of the ecological metrics (Bray-Curtis:  $p = 0.07$ , Aitchinson:  $p = 0.26$ ). Mean dispersion was  
447 otherwise consistent with the significant results observed in the ITS2 region amplicon data.  
448 PERMANOVA results have been shown to confuse dispersion differences and centroid  
449 differences when not using a balanced design. Therefore, our results may indicate that either  
450 mean centroids, mean dispersions, or both are differing between sample types and sites here.

451

#### 452 **Mantel tests suggest weak distance-decay relationships within oceans**

453

454 Mantel tests indicated a small, but significant positive relationship between both metrics of  
455 community structure (Bray-Curtis, Hellinger) and geographic distance for leaves across the  
456 Pacific Ocean for the ITS2 region and 18S rRNA gene amplicon datasets ( $p < 0.001$ , Figure 3A,  
457 Figure S3A, Table S2). This relationship was also detected for leaves across the Atlantic Ocean  
458 ( $p < 0.001$ , Figure 3B, Figure S3B, Table S2). Mantel correlograms suggest that this pattern is  
459 driven by sites with the closest proximity, such that sites closer together have more similar  
460 fungal communities compared to sites further away (Figure S4). In the Pacific Ocean, roots had  
461 consistently the strongest positive relationship with geographic distance for both the ITS2 region  
462 and 18S rRNA gene amplicon datasets ( $p < 0.001$ , Figure S3C, Figure S5A, TableS2).  
463 Interestingly, a much weaker, but still significant, positive relationship was observed for roots in  
464 the Atlantic Ocean ( $p < 0.001$ , Figure S3D, Figure S5B, Table S2). Sediment in the Pacific  
465 Ocean had the weakest relationship with distance with conflicting significance for the ITS2  
466 region (Bray-Curtis:  $p < 0.001$ ; Hellinger:  $p = 0.827$ ) and only small, but still significant  
467 correlations for 18S rRNA gene amplicon datasets (Bray-Curtis:  $p = 0.031$ ; Hellinger:  $p = 0.011$ ,  
468 Figure S3E, Figure S5C, Table S2). In contrast in the Atlantic Ocean, sediment had much more

469 robust positive relationships with geographic distance for both datasets ( $p < 0.001$ , Figure S3F,  
470 Figure S5D, Table S2). Multiple regression analyses further confirmed all significant patterns of  
471 observed distance-decay ( $p < 0.001$ ).

472

### 473 **Mean taxonomic composition of the global mycobiome**

474

475 The majority of taxonomic orders had mean relative abundances that were significantly different  
476 between sample types in both the ITS2 region amplicon and 18S rRNA gene amplicon datasets  
477 (K-W test,  $p < 0.01$ , Figure S6) and many of these were enriched on *Z. marina* tissues over  
478 rhizosphere sediment. In the ITS2 region amplicon data, Dothideales, Lobulomycetales, and  
479 unclassified Sordariomycetes were all enriched on both leaf and root tissues relative to  
480 sediment (Dunn,  $p < 0.01$ ). Polyporales, Helotiales, Hypocreales, Capnodiales and  
481 Malasseziales were all in higher abundance on leaves ( $p < 0.001$ ). Unclassified Ascomycota  
482 had increased relative abundance on roots ( $p < 0.001$ ). Fungi that were unable to be classified  
483 to the phylum level were more abundant on roots and in rhizosphere sediment relative to leaves  
484 ( $p < 0.001$ ). Comparatively, in the 18S rRNA gene data, Saccharomycetales were enriched on  
485 the leaves ( $p < 0.001$ ) and unclassified Chytridiomycota and unclassified Sordariomycetes were  
486 in greater abundance on roots ( $p < 0.001$ ). We attribute differences between the two datasets to  
487 the use of different primer sets which each have their own biases, as well as the different  
488 reference databases used for each amplicon to assign taxonomy.

489

### 490 **Global core leaf, root and sediment mycobiomes**

491

492 We utilized abundance-occupancy distributions of ASVs to infer global *Z. marina* leaf, root and  
493 rhizosphere sediment core mycobiomes based on ASV rank contributions to beta diversity. A  
494 total of 14, 15, and 60 ASVs were predicted as being in the leaf, root, and sediment cores

495 respectively based on the ITS2 region amplicon data (Figure 4A, Table S3). Four ASVs  
496 overlapped across all three cores; this included generalist fungi with widespread distributions  
497 like *Cladosporium sp.* and *Malassezia restricta* (Amend, 2014; Ettinger & Eisen, 2020).  
498 Interestingly, only one ASV was shared between leaf and root cores, *Saccharomyces*  
499 *paradoxus* (ITS\_SV260). The leaf core was dominated by unclassified Capnodiales spp., while  
500 the root core was dominated by unclassified Sordariomycetes spp. The sediment core was  
501 more diverse, but was composed mostly of Ascomycota, particularly members in the  
502 Pleosporales and Agaricales.

503  
504 Smaller core mycobiomes were predicted from the 18S rRNA gene amplicon data with only 9,  
505 14, and 13 ASVs placed in the leaf, root, and sediment cores, and no ASVs overlapped  
506 between the three cores (Figure 4B, Table S4). However, five ASVs were shared between leaf  
507 and root cores, three belonging to unclassified Chytridiomycota lineages, a *Saccharomyces* sp.  
508 and an unclassified Sordariomycetes sp. A total of four ASVs were unique to the leaf core which  
509 was dominated by unclassified Chytridiomycota lineages and nine ASVs were unique to the root  
510 core which was predominantly comprised of unclassified Sordariomycetes spp. and unclassified  
511 Chytridiomycota lineages (including Lobulomycetaceae spp.). The sediment core was mostly  
512 made of Saccharomycetales lineages and Chytridiomycota lineages.

513

#### 514 **Neutral models to predict ASV selection**

515

516 We applied Sloan neutral models to investigate if core ASVs are selected for by *Z. marina*,  
517 assembled through stochastic or deterministic processes (Sloan *et al.*, 2007; Burns *et al.*, 2016).  
518 ASVs that fall above the neutral model prediction appear in higher occupancy than would be  
519 predicted based on their relative abundance and are thus, thought to be selected for by the  
520 plant environment. ASVs that fall below the neutral model prediction have higher relative

521 abundance than would be predicted based on their occupancy and are thus, thought to be either  
522 selected-against by the plant host or dispersal-limited. For the ITS2 region abundance-  
523 occupancy distributions, 2.9%, 4.84%, and 3.74% of all ASVs fell above/below the neutral  
524 model prediction for leaves, roots and sediment respectively (Figure 5). While for the 18S rRNA  
525 gene abundance-occupancy distributions, 7.5%, 6.44%, and 2.16% of all ASVs deviated from  
526 the neutral model (Figure S7). Further, looking at deviations from the neutral model for ASVs  
527 predicted to be in the core mycobiome allows insight into the role of *Z. marina* in core assembly.  
528 We found that of the core leaf, core root and core sediment ASVs several were predicted to be  
529 plant-selected ( $n_{\text{leaf}} = 6$ ,  $n_{\text{root}} = 7$ ,  $n_{\text{sediment}} = 40$ ), only a few were selected-against or dispersal-  
530 limited ( $n_{\text{leaf}} = 1$ ,  $n_{\text{root}} = 3$ ,  $n_{\text{sediment}} = 4$ ), and most were neutrally selected ( $n_{\text{leaf}} = 16$ ,  $n_{\text{root}} = 19$ ,  
531  $n_{\text{sediment}} = 29$ ).

532

533 Generally the neutral models had poor fits for both the ITS2 region (leaf:  $R^2 = 0.31$ ; root:  $R^2 =$   
534  $0.44$ ; sediment:  $R^2 = -0.76$ ), and 18S rRNA gene datasets (leaf:  $R^2 = 0.49$ ; root:  $R^2 = 0.50$ ;  
535 sediment:  $R^2 = 0.08$ ), with the sediment curves having the worst fit to the neutral model. This  
536 could potentially be attributed to the low predicted migration rates for both the ITS2 region (leaf:  
537  $m = 0.001$ ; root:  $m = 0.002$ ; sediment:  $m = 0.001$ ) and 18S rRNA gene datasets (leaf:  $m =$   
538  $0.002$ ; root:  $m = 0.014$ ; sediment:  $m = 0.014$ ). These values are consistent with other studies of  
539 fungi that used neutral models on abundance-occupancy curves of fungi (Stopnisek & Shade)  
540 and may be reflective of dispersal limitation playing a stronger role in fungal assembly than  
541 bacterial community assembly (Talbot *et al.*, 2014; Tedersoo *et al.*, 2014; Gumiere *et al.*, 2016).

542

### 543 **Global distribution of differentially abundant ASVs**

544

545 To investigate variation in fungal community composition at greater taxonomic resolution, we  
546 used DESeq2 to identify ASVs whose abundance differed across sample types (Figure S8 and

547 S9). The greatest number of differentially abundant ASVs was observed between the roots and  
548 sediment, with fourteen ITS2 region ASVs and four 18S rRNA gene ASVs (Wald test,  $p < 0.01$ ).  
549 This was closely followed by differentially abundant ASVs between leaves and sediment, with  
550 twelve ITS2 region ASVs and two 18S rRNA gene ASVs ( $p < 0.05$ ). The smallest number of  
551 differentially abundant ASVs was found between leaves and roots, with three ITS2 region ASVs  
552 ( $p < 0.01$ ). We compared the differentially abundant ASVs to those predicted to be in the leaf,  
553 root and sediment core mycobiomes. We found fourteen ASVs that were both differentially  
554 abundant between sample types and present in at least one core mycobiome; of those fourteen,  
555 seven were also found to deviate from the neutral model (Table 1). We then examined the  
556 global distribution of the fourteen ASVs that were both differentially abundant across sample  
557 types and predicted to be in the *Z. marina* core mycobiome. For example, ITS\_SV260  
558 (*Saccharomyces paradoxus*) appears to be globally distributed, neutrally selected, and more  
559 abundant on leaves and roots than sediment ( $p < 0.001$ , Figure 6). In contrast, ITS\_SV362  
560 (*Lobulomyces* sp.) appears to be only found at one site, dispersal-limited, and is more abundant  
561 on leaves than sediment ( $p < 0.001$ , Figure 7).

562

### 563 **Fungi are only a small portion of *Z. marina* associated eukaryotic community**

564

565 Fungal sequences made up only a tiny portion of the entire epiphytic eukaryotic community  
566 associated with *Z. marina* with a mean relative abundance on leaves of  $0.50 \pm 2.12\%$ , roots of  
567  $0.12 \pm 0.36\%$ , and sediment of  $0.23 \pm 0.67\%$  in the 18S rRNA gene dataset (Figure S10). The  
568 leaf eukaryotic community was generally dominated by diatoms, the root community by both  
569 diatoms and Peronosporomycetes (i.e. oomycetes) and the sediment community by both  
570 diatoms and dinoflagellates.

571

### 572 **Many ASVs have no predicted functional guild**

573

574 Although FUNGuild was able to predict the functional guild and trophic mode of 78.62% of ASVs  
575 in the ITS2 region amplicon dataset, only 10.12% of ASVs had predictions at a confidence of  
576 “Highly Probable”. The most abundant functional guilds assigned at this confidence level  
577 included wood saprotroph, ectomycorrhizal, lichenized, endophyte, plant pathogen-wood  
578 saprotroph, and fungal parasite (Figure S11). Comparatively, FUNGuild was only able to predict  
579 functions for 35.31% of the ASVs in the 18S rRNA gene dataset and only 3.4% of those ASVs  
580 had “Highly Probable” predictions. Generally, the most abundant functional guilds at this  
581 confidence level were consistent with those in the ITS2 region dataset and included wood  
582 saprotroph, ectomycorrhizal, and plant pathogen (Figure S12). When we further investigated the  
583 predicted trophic modes of only the most abundant ASVs (mean relative abundance greater  
584 than 0.1 percent) in both the ITS2 region amplicon and 18S rRNA amplicon datasets, 38.38%  
585 and 63.5% of these ASVs respectively were unable to be assigned a function, a testament to  
586 how little we know about the functional roles of fungi in this system.

587

## 588 **Discussion**

589

590 Our study of the *Zostera marina* mycobiome provides insight into the global distribution of host-  
591 associated fungi in the marine environment and highlights the need for future studies of marine  
592 fungal community dynamics and function. We found that the fungal community was different  
593 between sites globally and observed a small, but significant pattern of distance-decay for the *Z.*  
594 *marina* mycobiome. We defined a small core mycobiome for leaves, roots and sediment  
595 dominated by Sordariomycetes spp., Chytridiomycota lineages (including Lobulomycetaceae  
596 spp.), Capnodiales spp. and. Many differentially abundant core ASVs (e.g. *Lobulomyces* sp.)  
597 were only found at one or a few locations (e.g. possibly due to local adaptation, dispersal  
598 limitation or seasonal bloom events), while others (e.g. *Saccharomyces* sp.) were more

599 ubiquitous across all locations suggesting a true global distribution and selection by the plant  
600 itself. Additionally, between the observed pattern of distance-decay, the shape of the fungal  
601 abundance-occupancy curves and the poor fit of the Sloan neutral model, it appears that,  
602 although affected by both stochastic and deterministic processes, the mycobiome of *Z. marina*  
603 may be more affected by deterministic factors (e.g. environmental filtering, host genetics,  
604 dispersal limitation) than perhaps expected. Finally, we found a large portion of ASVs were  
605 unable to be classified taxonomically and most ASVs were not able to be assigned a predicted  
606 functional guild, further highlighting how little we know about seagrass-associated fungi.

607  
608 This study is the first to characterize the *Zostera marina* mycobiome across its full  
609 biogeographic distribution using culture-independent methods. We observed significant  
610 differences in alpha diversity both across seagrass tissues and across collection sites. From the  
611 18S rRNA data, we observed that the alpha diversity of the sediment is more diverse than *Z.*  
612 *marina* tissues which is consistent with previous seagrass work (Wainwright *et al.*, 2019b;  
613 Hurtado-McCormick *et al.*, 2019; Ettinger & Eisen, 2019). However, across both datasets, we  
614 also found that leaves had a lower alpha diversity than roots, which is not consistent with our  
615 previous study of *Z. marina* (Ettinger & Eisen, 2019). This may be due to the different primer  
616 sets used in both studies as the use of different sequencing primers has been shown to have  
617 drastic effects on the results of mycobiome studies (Frau *et al.*, 2019). Primer bias and different  
618 reference databases may additionally explain some of the variation we found within this study  
619 between our two different amplicon datasets. This is not the first study to observe alpha diversity  
620 varying across sites. Previous seagrass work found that alpha diversity varied between sites  
621 (Wainwright *et al.*, 2019b; Hurtado-McCormick *et al.*, 2019), while other work found no  
622 differences in alpha diversity between sites (Trevathan-Tackett *et al.*, 2020).

623



624 In addition to differences in alpha diversity, we also observed differences in fungal community  
625 structure across tissues and sites. Differences in fungal beta diversity across sites and tissues  
626 has been reported previously for seagrasses (Bengtsson *et al.*, 2017; Wainwright *et al.*, 2018,  
627 2019b; Hurtado-McCormick *et al.*, 2019; Ettinger & Eisen, 2019; Trevathan-Tackett *et al.*, 2020).  
628 Seasonal differences in fungal colonization of seagrasses have been observed previously and  
629 are likely contributing to the variation observed here between sites (Mata & Cebrián, 2013). The  
630 global planktonic marine fungal community has been found to cluster by ocean (Hassett *et al.*,  
631 2020) and differences between oceans were observed here as well. However, site-to-site  
632 variation was a stronger factor driving differences suggesting that environmental or host plant  
633 filtering may play a critical role in assembling the fungal community associated with *Z. marina*.  
634  
635 It has long been thought that there are few barriers to fungal dispersal (Hyde *et al.*, 1998; Finlay,  
636 2002; Fenchel & Finlay, 2004; Cox *et al.*, 2016). However, not every fungus is everywhere  
637 (Peay *et al.*, 2010), and there is increasing evidence for rampant environmental filtering and  
638 barriers to fungal dispersal for host-associated fungi in the marine ecosystem (Wainwright *et al.*,  
639 2018, 2019a,b). The importance of biogeography for seagrass-associated fungal community  
640 structure can be seen in our observation of a small, but significant positive distance-decay  
641 relationship between geographic distance and community structure. This relationship suggests  
642 that sites closer together have more similar fungal communities compared to sites that are more  
643 distant from each other. Previously, similar distance-decay relationships were found present for  
644 other seagrass-associated fungal communities including with the seagrass, *Enhalus acoroides*,  
645 in Singapore and Peninsular Malaysia (2019b) and the seagrass, *Syringodium isoetifolium*,  
646 along Wallace's line (Wainwright *et al.*, 2018).  
647  
648 The observed positive relationship between community structure and geographic distance is  
649 likely driven by a combination of factors including dispersal limitation, environmental filtering

650 caused by local habitat differences and priority effects. Another factor that might be driving site-  
651 specific fungal community composition is host plant genetics. Host plant genotype has been  
652 found in other studies to strongly correlate with leaf fungal communities (Bálint *et al.*, 2013;  
653 Hunter *et al.*, 2015; Sapkota *et al.*, 2015). The natural dispersal distance of *Z. marina* is thought  
654 to be less than 150 km and there is some evidence of poor connectivity between locations and  
655 rampant inbreeding within locations (Olsen *et al.*, 2004; Muñoz-Salazar *et al.*, 2005; Campanella  
656 *et al.*, 2010; Ort *et al.*, 2012). Given the strong population structure and weak dispersal of *Z.*  
657 *marina*, variation in *Z. marina* genotypes could be playing a role in structuring the fungal  
658 community differences observed here. However, it should be noted that Wainwright *et al.* failed  
659 to find a correlation between *S. isoetifolium* genetics and fungal community composition in their  
660 study (2018). Regardless, there is growing evidence that seagrass-associated fungal  
661 communities are more similar at closer distances, and future work should look for correlations  
662 between *Z. marina* genetics, *Z. marina* dispersal and the fungal community.

663

664 Even though there were site-to-site differences in community structure, the global mycobiome of  
665 *Z. marina* was generally composed of members of taxonomic orders previously observed to  
666 associate with *Z. marina* and other seagrass species using culture-independent methods  
667 (Wainwright *et al.*, 2018, 2019b; Hurtado-McCormick *et al.*, 2019; Ettinger & Eisen, 2019, 2020;  
668 Trevathan-Tackett *et al.*, 2020). This diversity is also in line with cultivation efforts which have  
669 found Eurotiomycetes, Dothideomycetes, and Sordariomycetes to be the main classes of fungi  
670 associated with seagrasses (Sakayaroj *et al.*, 2010; Supaphon *et al.*, 2017; Ettinger & Eisen,  
671 2020). Altogether our results are consistent with previous reports that the seagrass mycobiome  
672 is comprised of many ASVs, including many Chytridiomycota lineages, for which a specific  
673 taxonomic assignment cannot be made based on current datasets that are biased towards  
674 terrestrial fungi (Wainwright *et al.*, 2019b; Ettinger & Eisen, 2019; Trevathan-Tackett *et al.*,  
675 2020). Likely contributing to this bias, only a few lineages of marine Chytridiomycota have been

676 described using culture-based methods (Jones *et al.*, 2015, 2019) despite their dominance in  
677 DNA-based surveys of the marine environment (Hassett *et al.*, 2017, 2020; Ettinger & Eisen,  
678 2019). The inability to taxonomically classify fungal sequences is a persistent problem for  
679 studies of the marine environment generally, and again serves to highlight the need for  
680 additional descriptive studies of these understudied marine organisms (Comeau *et al.*, 2016;  
681 Nagano *et al.*, 2017; Picard, 2017; Hassett *et al.*, 2017, 2020).

682  
683 Despite being unable to taxonomically classify many *Z. marina* associated fungal sequences,  
684 we were still able to identify a small “common” core community associated with *Z. marina*  
685 tissues, with only a few ASVs unique to or shared between leaves and roots (Figure 4).  
686 Previously, Trevathan-Tackett *et al.* (2020) were able to identify a small core of eight fungal  
687 operational-taxonomic units (OTUs) associated with the leaves of *Zostera muelleri*, while  
688 Hurtado-McCormick (2019) were unable to identify a core fungal community on *Z. muelleri*  
689 leaves. The *Z. marina* core leaf and root mycobiomes were dominated by Sordariomycetes  
690 spp., Chytridiomycota lineages (including Lobulomycetaceae spp. which have previously been  
691 seen to dominate on this species (Ettinger & Eisen, 2019)) and *Saccharomyces* spp. (Table 1,  
692 Table S3, Table S4). Sordariomycetes were also found to dominate the core leaf mycobiome in  
693 Trevathan-Tackett *et al.* (2020). Only four ASVs overlapped between the core communities for  
694 leaves, root and sediment and these ASVs largely were assigned to known ubiquitous marine  
695 generalists (e.g. *Cladosporium* (Ettinger & Eisen, 2020), *Malassezia* (Amend, 2014)).

696  
697 The expected shape of a microbial abundance-occupancy distribution is an ‘S’, with abundant  
698 taxa having the highest occupancies and rare taxa having the lowest occupancies (Shade &  
699 Stopnisek, 2019). However, the abundance-occupancy distributions for our data here do not  
700 have this shape. One possible reason for this deviation is an increased incidence of high  
701 abundance, but low occupancy taxa (i.e. “clumping” (Wright, 1991)) which can be suggestive of

702 niche selection (Morella *et al.*, 2020). Clumping is thought to be impacted by spatial variation in  
703 habitat quality, localized reproduction, and stochastic immigration-extinction processes (Wright,  
704 1991). Clumping may also be the result of a competitive lottery-based assembly of the  
705 mycobiome (i.e. inhibitory priority effects) which means the first species to arrive will take over  
706 the entire niche, excluding other group members (Verster & Borenstein, 2018). In addition to not  
707 having the expected abundance-occupancy shape, our data had poor fit to the Sloan neutral  
708 model, although the fit was generally consistent with other studies of fungi (Stopnisek & Shade),  
709 and also of bacteria (Burns *et al.*, 2016). Thus, the poor fit of the neutral model may indicate that  
710 deterministic factors such as competition for niche space, extreme dispersal limitation and  
711 variation in habitat quality may be playing a larger role than expected in assembly dynamics of  
712 seagrass-associated fungi.

713

714 Regardless of model fit, we plotted the global distribution of fourteen core ASVs which were  
715 found to be differentially abundant across *Z. marina* tissues with seven deviating from the  
716 neutral model (Table 1). Some of these ASVs were found to be globally distributed, while others  
717 showed site specificity. For example, both ITS\_SV260 (*Saccharomyces paradoxus*) and  
718 18S\_SV928 (*Saccharomyces* sp.) were globally distributed and more abundant on leaves and  
719 roots ( $p < 0.001$ , Figure 6, Figure S14). ITS\_SV260 was predicted to be neutrally selected while  
720 18S\_SV928 was predicted to be plant-selected. *S. paradoxus* is a wild yeast, the sister species  
721 to *S. cerevisiae* and has been previously observed as a plant endophyte (Glushakova *et al.*,  
722 2007; Ricks & Koide, 2019). Given the relative abundance of *Saccharomyces* in both the ITS  
723 and 18S rRNA gene datasets on *Z. marina* leaves and roots, the global distribution of this taxon  
724 and its deviation from the neutral model in the 18S rRNA gene dataset (e.g. 18S\_SV928),  
725 *Saccharomyces* sp. seems like a good candidate for future work in this system.

726

727 In comparison, ITS\_SV362 (*Lobulomyces* sp.) was only found at one site, dispersal-limited and  
728 is more abundant on leaves ( $p < 0.001$ , Figure 7). Lobulomycetales have previously been  
729 observed in high abundance on and inside *Z. marina* leaves (Ettinger & Eisen, 2019). Members  
730 of the Lobulomycetales and marine fungi more generally have been observed to have seasonal  
731 dynamics which may relate to host-dynamics and environmental conditions (Longcore,  
732 1992; Seto & Degawa, 2015; Hassett & Gradinger, 2016; Rojas-Jimenez *et al.*, 2019).  
733 Additionally, marine chytrids are known to parasitize seasonal blooms of diatoms (Hassett &  
734 Gradinger, 2016; Taylor & Cunliffe, 2016) and diatoms are the dominant eukaryotes observed  
735 on seagrass leaf tissues here (Figure S10). Future studies should attempt to confirm whether  
736 these and other chytrids assigned to the core mycobiome of *Z. marina* are parasitizing closely  
737 associated diatoms or associated with seagrass leaf tissues directly.

738

739 In our previous work, we found a *Colletotrichum* sp. ASV to be an abundant endophyte on and  
740 in leaves (Ettinger & Eisen, 2019) and postulated that this taxa may be a *Z. marina* specialist  
741 (Ettinger & Eisen, 2020). However, no ASVs taxonomically assigned as *Colletotrichum* sp. were  
742 defined as part of the global core microbiome, although one ASV, ITS\_SV219, was found to  
743 deviate from the neutral model and was predicted to be dispersal-limited. Its global distribution  
744 supports a pattern of endemism to only a few locations including Bodega Bay, CA, the location  
745 of our previous studies (Figure S14). Local adaptation of marine fungi is consistent with patterns  
746 of endemism seen in terrestrial fungal studies (Meiser *et al.*, 2014; Grantham *et al.*, 2015), and  
747 *Colletotrichum* sp. has been seen before as an endemic endophyte in *Arabidopsis thaliana*  
748 (Hiruma *et al.*, 2016). One limitation of 'core' community analyses generally, is that it often  
749 underplays the importance of rare microbes which can also be essential for host function  
750 (Jousset *et al.*, 2017). Thus, future work should include studies of the functional importance of  
751 *Colletotrichum* sp. and other rare members of the *Z. marina* mycobiome.

752

753 Fungi are not the only eukaryotic microbes associated with *Z. marina* and there are many other  
754 understudied microorganisms that likely have important roles in the seagrass ecosystem. In  
755 fact, seagrass-associated fungi were represented by a mean relative abundance of less than  
756 one percent in the 18S rRNA amplicon dataset. This is generally consistent with the proportion  
757 of fungi in other marine eukaryotic studies (e.g. 1.3% fungal sequences in Hassett et al. (2020)).  
758 Instead, the *Z. marina* associated eukaryotic community was generally dominated by diatoms,  
759 oomycetes, and dinoflagellates. Diatom dominance was previously observed in a culture-  
760 independent effort of *Z. marina* which found that the bacterial and eukaryotic epibiont  
761 communities were highly correlated (Bengtsson *et al.*, 2017). Additionally, oomycetes have  
762 been previously cultured in association with *Z. marina* and are thought to function as  
763 opportunistic pathogens or saprotrophs in this system (Man in 't Veld *et al.*, 2011, 2019; Ettinger  
764 & Eisen, 2020).

765 Finally, we used FUNGuild to gain insight into possible functional roles of mycobiome, but  
766 unfortunately FUNGuild was only able to predict the function of a small portion of ASVs with  
767 high confidence. For what could be predicted, the seagrass mycobiome was found to be made  
768 of a community of wood saprotrophs, ectomycorrhizal fungi, endophytic fungi and plant  
769 pathogens. This functional distribution fits with what might be expected for a plant-associated  
770 fungal community, as well as, with what is known of the functional guilds of close relatives of  
771 fungal isolates previously isolated from *Z. marina* (Ettinger & Eisen, 2020). However, many  
772 dominant members of the fungal community associated with *Z. marina* were not able to be  
773 assigned a functional guild, leaving a lot of functional uncertainty to still be explored in this  
774 system. Additional studies characterizing seagrass-associated fungi are needed to understand  
775 the taxonomic diversity and functional roles of these fungi in the marine ecosystem generally  
776 and in particular when associated with seagrasses.

777

778 **Author Contributions**

779 Cassandra L. Ettinger analyzed the data, prepared figures and/or tables, performed statistics,  
780 wrote and reviewed drafts of the paper.

781 Laura E. Vann organized experimental design, sample collection and processing, edited and  
782 reviewed drafts of the paper.

783 Jonathan A. Eisen advised on data analysis, edited and reviewed drafts of the paper.

784 **DNA Deposition**

785 The raw sequences of the ITS2 region and 18S rRNA gene amplicons were deposited at  
786 GenBank under accession no. [PRJNA667465](#) and [PRJNA667462](#) respectively. Sequence reads  
787 are also available from the JGI Genome Portal  
788 (<https://genome.jgi.doe.gov/portal/Popandseaspecies/Popandseaspecies.info.html>).

789 **Acknowledgements**

790 We would like to thank the *Zostera* Experimental Network for helping with sample collection. We  
791 are also grateful to Alana J. Firl for assistance in constructing sampling kits, as well as Mikayla  
792 Mager and Shuiquan Tang from Zymo Research, Inc. for organizing the DNA extractions. We  
793 are very appreciative to Susannah Tringe (ORCID: [0000-0001-6479-8427](#)) from the U.S.  
794 Department of Energy Joint Genome Institute for helping organize the sequencing component of  
795 this project. Guillaume Jospin (ORCID: [0000-0002-8746-2632](#)) for his assistance downloading  
796 the data files from the JGI web server. John J. Stachowicz and Jeanine L. Olsen for helpful  
797 comments and suggestions on this manuscript.

798

799 **Funding sources**

800 This work was supported in part by a community sequencing proposal from the U.S.  
801 Department of Energy Joint Genome Institute, "Population and evolutionary genomics of

802 Zostera marina and its microbiome, and genome diagnostics of other seagrass species”  
803 (proposal ID# 503251). The work conducted by the U.S. Department of Energy Joint Genome  
804 Institute was further supported by the Office of Science of the U.S. Department of Energy under  
805 Contract No. DE-AC02-05CH11231. The funders had no role in study design, data collection  
806 and analysis, decision to publish, or preparation of the manuscript.

807

808 **COI**

809 Jonathan A. Eisen is on the Scientific Advisory Board of Zymo Research, Inc, and Zymo  
810 Research, Inc performed the DNA extractions associated with the project at no cost. Laura E.  
811 Vann is now an employee at Novozymes.

812

813

814

815

816

817

818

819

820

821

822

823

824

825

826

827



## 828 References

- 829 **Abarenkov K, Zirk A, Piirmann T, Pöhönen R, Ivanov F, Nilsson RH, Kõljalg U. 2020.**  
830 UNITE general FASTA release for eukaryotes 2.
- 831 **Ainsworth TD, Krause L, Bridge T, Torda G, Raina J-B, Zakrzewski M, Gates RD, Padilla-**  
832 **Gamiño JL, Spalding HL, Smith C, et al. 2015.** The coral core microbiome identifies rare  
833 bacterial taxa as ubiquitous endosymbionts. *The ISME journal* **9**: 2261–2274.
- 834 **Aitchison J, Barceló-Vidal C, Martín-Fernández JA, Pawłowsky-Glahn V. 2000.** Logratio  
835 Analysis and Compositional Distance. *Mathematical geology* **32**: 271–275.
- 836 **Allaire JJ, Xie Y, McPherson J, Luraschi J, Ushey K, Atkins A, Wickham H, Cheng J,**  
837 **Chang W, Iannone R. 2020.** rmarkdown: Dynamic Documents for R.
- 838 **Amend A. 2014.** From dandruff to deep-sea vents: Malassezia-like fungi are ecologically hyper-  
839 diverse. *PLoS pathogens* **10**: e1004277.
- 840 **Amend A, Burgaud G, Cunliffe M, Edgcomb VP, Ettinger CL, Gutiérrez MH, Heitman J,**  
841 **Hom EFY, Ianiri G, Jones AC, et al. 2019.** Fungi in the Marine Environment: Open Questions  
842 and Unsolved Problems. *mBio* **10**.
- 843 **Anderson MJ. 2001.** A new method for non-parametric multivariate analysis of variance.  
844 *Austral Ecology* **26**: 32–46.
- 845 **Bálint M, Tiffin P, Hallström B, O’Hara RB, Olson MS, Fankhauser JD, Piepenbring M,**  
846 **Schmitt I. 2013.** Host Genotype Shapes the Foliar Fungal Microbiome of Balsam Poplar  
847 (*Populus balsamifera*). *PLoS ONE* **8**: e53987.
- 848 **Baselga A, Orme D, Vileger S, De Bortoli J, Leprieur F. 2018.** betapart: Partitioning Beta  
849 Diversity into Turnover and Nestedness Components.
- 850 **Bass AJ, Robinson DG, Lianoglou S, Nelson E, Storey JD, from Laurent Gatto WC. 2020.**  
851 biobroom: Turn Bioconductor objects into tidy data frames.
- 852 **Becker RA. 2018.** maps: Draw Geographical Maps.
- 853 **Bengtsson MM, Bühler A, Brauer A, Dahlke S, Schubert H, Blindow I. 2017.** Eelgrass Leaf  
854 Surface Microbiomes Are Locally Variable and Highly Correlated with Epibiotic Eukaryotes.  
855 *Frontiers in microbiology* **8**: 1312.
- 856 **Borovec O, Vohník M. 2018.** Ontogenetic transition from specialized root hairs to specific root-  
857 fungus symbiosis in the dominant Mediterranean seagrass *Posidonia oceanica*. *Scientific*  
858 *reports* **8**: 10773.
- 859 **Bray JR, Roger Bray J, Curtis JT. 1957.** An Ordination of the Upland Forest Communities of  
860 Southern Wisconsin. *Ecological Monographs* **27**: 325–349.
- 861 **Burns AR, Stephens WZ, Stagaman K, Wong S, Rawls JF, Guillemin K, Bohannan BJ.**  
862 **2016.** Contribution of neutral processes to the assembly of gut microbial communities in the  
863 zebrafish over host development. *The ISME journal* **10**: 655–664.
- 864 **Callahan BJ, McMurdie PJ, Rosen MJ, Han AW, Johnson AJA, Holmes SP. 2016.** DADA2:

- 865 High-resolution sample inference from Illumina amplicon data. *Nature Methods* **13**: 581–583.
- 866 **Campanella JJ, Bologna PA, Smalley JV, Rosenzweig EB, Smith SM. 2010.** Population  
867 structure of *Zostera marina* (eelgrass) on the western Atlantic coast is characterized by poor  
868 connectivity and inbreeding. *The Journal of heredity* **101**: 61–70.
- 869 **Capone DG. 1982.** Nitrogen Fixation (Acetylene Reduction) by Rhizosphere Sediments of the  
870 Eelgrass *Zostera marina*. *Marine Ecology Progress Series* **10**: 67–75.
- 871 **Chave J. 2004.** Neutral theory and community ecology. *Ecology Letters* **7**: 241–253.
- 872 **Chen H. 2018.** VennDiagram: Generate High-Resolution Venn and Euler Plots.
- 873 **Comeau AM, Vincent WF, Bernier L, Lovejoy C. 2016.** Novel chytrid lineages dominate  
874 fungal sequences in diverse marine and freshwater habitats. *Scientific reports* **6**: 30120.
- 875 **Cox F, Newsham KK, Bol R, Dungait JAJ, Robinson CH. 2016.** Not poles apart: Antarctic soil  
876 fungal communities show similarities to those of the distant Arctic. *Ecology letters* **19**: 528–536.
- 877 **Crump BC, Wojahn JM, Tomas F, Mueller RS. 2018.** Metatranscriptomics and Amplicon  
878 Sequencing Reveal Mutualisms in Seagrass Microbiomes. *Frontiers in microbiology* **9**: 388.
- 879 **Cúcio C, Engelen AH, Costa R, Muyzer G. 2016.** Rhizosphere Microbiomes of European  
880 Seagrasses Are Selected by the Plant, But Are Not Species Specific. *Frontiers in Microbiology*  
881 **7**.
- 882 **Dray S, Dufour A--B. 2007.** The ade4 Package: Implementing the Duality Diagram for  
883 Ecologists. *Journal of Statistical Software* **22**: 1–20.
- 884 **Duffy JE, Reynolds PL, Boström C, Coyer JA, Cusson M, Donadi S, Douglass JG, Eklöf  
885 JS, Engelen AH, Eriksson BK, et al. 2015.** Biodiversity mediates top-down control in eelgrass  
886 ecosystems: a global comparative-experimental approach. *Ecology letters* **18**: 696–705.
- 887 **Eddelbuettel D. 2013.** Seamless R and C++ Integration with Rcpp.
- 888 **Elzhov TV, Mullen KM, Spiess A-N, Bolker B. 2016.** minpack.lm: R Interface to the  
889 Levenberg-Marquardt Nonlinear Least-Squares Algorithm Found in MINPACK, Plus Support for  
890 Bounds.
- 891 **Ettinger C. 2020.** *casett/Global\_ZM\_fungi\_amplicons*.
- 892 **Ettinger CL, Eisen JA. 2019.** Characterization of the Mycobiome of the Seagrass, , Reveals  
893 Putative Associations With Marine Chytrids. *Frontiers in microbiology* **10**: 2476.
- 894 **Ettinger CL, Eisen JA. 2020.** Fungi, bacteria and oomycota opportunistically isolated from the  
895 seagrass, *Zostera marina*. *PloS one* **15**: e0236135.
- 896 **Ettinger CL, Voerman SE, Lang JM, Stachowicz JJ, Eisen JA. 2017a.** Microbial communities  
897 in sediment from patches, but not the leaf or root microbiomes, vary in relation to distance from  
898 patch edge. *PeerJ* **5**: e3246.
- 899 **Ettinger CL, Williams SL, Abbott JM, Stachowicz JJ, Eisen JA. 2017b.** Microbiome  
900 succession during ammonification in eelgrass bed sediments. *PeerJ* **5**: e3674.

- 901 **Fahimipour AK, Kardish MR, Lang JM, Green JL, Eisen JA, Stachowicz JJ. 2017.** Global-  
902 Scale Structure of the Eelgrass Microbiome. *Applied and environmental microbiology* **83**.
- 903 **Fenchel T, Finlay BJ. 2004.** The Ubiquity of Small Species: Patterns of Local and Global  
904 Diversity. *BioScience* **54**: 777.
- 905 **Finlay BJ. 2002.** Global dispersal of free-living microbial eukaryote species. *Science* **296**:  
906 1061–1063.
- 907 **Fourqurean JW, Duarte CM, Kennedy H, Marbà N, Holmer M, Mateo MA, Apostolaki ET,**  
908 **Kendrick GA, Krause-Jensen D, McGlathery KJ, et al. 2012.** Seagrass ecosystems as a  
909 globally significant carbon stock. *Nature Geoscience* **5**: 505–509.
- 910 **Frau A, Kenny JG, Lenzi L, Campbell BJ, Ijaz UZ, Duckworth CA, Burkitt MD, Hall N,**  
911 **Anson J, Darby AC, et al. 2019.** DNA extraction and amplicon production strategies deeply inf  
912 luence the outcome of gut mycobiome studies. *Scientific reports* **9**: 9328.
- 913 **Gao Z, Li B, Zheng C, Wang G. 2008.** Molecular detection of fungal communities in the  
914 Hawaiian marine sponges *Suberites zeteki* and *Mycale armata*. *Applied and environmental*  
915 *microbiology* **74**: 6091–6101.
- 916 **Garnier S. 2018.** viridis: Default Color Maps from ‘matplotlib’.
- 917 **Gloor GB, Macklaim JM, Pawlowsky-Glahn V, Egozcue JJ. 2017.** Microbiome Datasets Are  
918 Compositional: And This Is Not Optional. *Frontiers in Microbiology* **8**.
- 919 **Glushakova AM, Ivannikova IV, Naumova ES, Chernov II, Naumov GI. 2007.** [Massive  
920 isolation and identification of *Saccharomyces paradoxus* yeasts from plant phyllosphere].  
921 *Mikrobiologija* **76**: 236–242.
- 922 **Gnavi G, Garzoli L, Poli A, Prigione V, Burgaud G, Varese GC. 2017.** The culturable  
923 mycobiota of *Flabellia petiolata*: First survey of marine fungi associated to a Mediterranean  
924 green alga. *PloS one* **12**: e0175941.
- 925 **Goslee SC, Urban DL. 2007.** The ecodist package for dissimilarity-based analysis of ecological  
926 data. *Journal of Statistical Software* **22**: 1–19.
- 927 **Grantham NS, Reich BJ, Pacifici K, Laber EB, Menninger HL, Henley JB, Barberán A, Leff**  
928 **JW, Fierer N, Dunn RR. 2015.** Fungi identify the geographic origin of dust samples. *PloS one*  
929 **10**: e0122605.
- 930 **Grossart H-P, Van den Wyngaert S, Kagami M, Wurzbacher C, Cunliffe M, Rojas-Jimenez**  
931 **K. 2019.** Fungi in aquatic ecosystems. *Nature reviews. Microbiology* **17**: 339–354.
- 932 **Grossart H-P, Wurzbacher C, James TY, Kagami M. 2016.** Discovery of dark matter fungi in  
933 aquatic ecosystems demands a reappraisal of the phylogeny and ecology of zoosporic fungi.  
934 *Fungal Ecology* **19**: 28–38.
- 935 **Gumiere T, Durrer A, Bohannan BJM, Andreote FD. 2016.** Biogeographical patterns in fungal  
936 communities from soils cultivated with sugarcane. *Journal of Biogeography* **43**: 2016–2026.
- 937 **Gutiérrez MH, Pantoja S, Tejos E, Quiñones RA. 2011.** The role of fungi in processing marine  
938 organic matter in the upwelling ecosystem off Chile. *Marine Biology* **158**: 205–219.

- 939 **Harrell FE Jr, from Charles Dupont WC, others. M. 2020.** Hmisc: Harrell Miscellaneous.
- 940 **Hassett BT, Ducluzeau A-LL, Collins RE, Gradinger R. 2017.** Spatial distribution of aquatic  
941 marine fungi across the western Arctic and sub-arctic. *Environmental microbiology* **19**: 475–484.
- 942 **Hassett BT, Gradinger R. 2016.** Chytrids dominate arctic marine fungal communities.  
943 *Environmental microbiology* **18**: 2001–2009.
- 944 **Hassett BT, Vonnahme TR, Peng X, Gareth Jones EB, Heuzé C. 2020.** Global diversity and  
945 geography of planktonic marine fungi. *Botanica Marina* **63**: 121–139.
- 946 **Hawksworth DL, Lücking R. 2017.** Fungal Diversity Revisited: 2.2 to 3.8 Million Species.  
947 *Microbiology spectrum* **5**.
- 948 **Hemminga MA, Duarte CM. 2000.** *Seagrass Ecology*. Cambridge University Press.
- 949 **Hijmans RJ. 2019.** geosphere: Spherical Trigonometry.
- 950 **Hiruma K, Gerlach N, Sacristán S, Nakano RT, Hacquard S, Kracher B, Neumann U,**  
951 **Ramírez D, Bucher M, O’Connell RJ, et al. 2016.** Root Endophyte Colletotrichum tofieldiae  
952 Confers Plant Fitness Benefits that Are Phosphate Status Dependent. *Cell* **165**: 464–474.
- 953 **Hothorn T, Hornik K, van de Wiel MA, Zeileis A. 2006.** A Lego system for conditional  
954 inference. *The American Statistician* **60**: 257–263.
- 955 **Hothorn T, Hornik K, van de Wiel MA, Zeileis A. 2008.** Implementing a class of permutation  
956 tests: The coin package. *Journal of Statistical Software* **28**: 1–23.
- 957 **Huber W, Carey VJ, Gentleman R, Anders S, Carlson M, Carvalho BS, Bravo HC, Davis S,**  
958 **Gatto L, Girke T, et al. 2015.** Orchestrating high-throughput genomic analysis with  
959 Bioconductor. *Nature Methods* **12**: 115–121.
- 960 **Hunter PJ, Pink DAC, Bending GD. 2015.** Cultivar-level genotype differences influence  
961 diversity and composition of lettuce ( *Lactuca* sp.) phyllosphere fungal communities. *Fungal*  
962 *Ecology* **17**: 183–186.
- 963 **Hurtado-McCormick V, Kahlke T, Petrou K, Jeffries T, Ralph PJ, Seymour JR. 2019.**  
964 Regional and Microenvironmental Scale Characterization of the Seagrass Microbiome. *Frontiers*  
965 *in microbiology* **10**: 1011.
- 966 **Huse SM, Ye Y, Zhou Y, Fodor AA. 2012.** A core human microbiome as viewed through 16S  
967 rRNA sequence clusters. *PLoS one* **7**: e34242.
- 968 **Hyde KD, Gareth Jones EB, Leñaño E, Pointing SB, Poonyth AD, Vrijmoed LLP. 1998.** Role  
969 of fungi in marine ecosystems. *Biodiversity and Conservation* **7**: 1147–1161.
- 970 **Jones EBG. 2011.** Are there more marine fungi to be described? *Botanica marina*.
- 971 **Jones EBG, Gareth Jones EB, Pang K-L, Abdel-Wahab MA, Scholz B, Hyde KD, Boekhout**  
972 **T, Ebel R, Rateb ME, Henderson L, et al. 2019.** An online resource for marine fungi. *Fungal*  
973 *Diversity* **96**: 347–433.
- 974 **Jones EBG, Gareth Jones EB, Suetrong S, Sakayaroj J, Bahkali AH, Abdel-Wahab MA,**

- 975 **Boekhout T, Pang K-L. 2015.** Classification of marine Ascomycota, Basidiomycota,  
976 Blastocladiomycota and Chytridiomycota. *Fungal Diversity* **73**: 1–72.
- 977 **Jousset A, Bienhold C, Chatzinotas A, Gallien L, Gobet A, Kurm V, Küsel K, Rillig MC,**  
978 **Rivett DW, Salles JF, et al. 2017.** Where less may be more: how the rare biosphere pulls  
979 ecosystems strings. *The ISME journal* **11**: 853–862.
- 980 **Kagami M, de Bruin A, Ibelings BW, Van Donk E. 2007.** Parasitic chytrids: their effects on  
981 phytoplankton communities and food-web dynamics. *Hydrobiologia* **578**: 113–129.
- 982 **Kirichuk NN, Pivkin MV. 2015.** Filamentous fungi associated with the seagrass *Zostera marina*  
983 Linnaeus, 1753 of Rifovaya Bay (Peter the Great Bay, the Sea of Japan). *Russian Journal of*  
984 *Marine Biology* **41**: 351–355.
- 985 **Lahti L, Shetty S.** microbiome R package.
- 986 **Lawrence M, Huber W, Pagès H, Aboyoun P, Carlson M, Gentleman R, Morgan M, Carey**  
987 **V. 2013.** Software for Computing and Annotating Genomic Ranges. *PLoS Computational*  
988 *Biology* **9**.
- 989 **Legendre P, Gallagher ED. 2001.** Ecologically meaningful transformations for ordination of  
990 species data. *Oecologia* **129**: 271–280.
- 991 **Littman R, Willis BL, Bourne DG. 2011.** Metagenomic analysis of the coral holobiont during a  
992 natural bleaching event on the Great Barrier Reef. *Environmental Microbiology Reports* **3**: 651–  
993 660.
- 994 **Longcore JE. 1992.** Morphology and Zoospore Ultrastructure of *Chytrium angularis* sp.  
995 nov. (Chytridiales). *Mycologia* **84**: 442.
- 996 **Love MI, Huber W, Anders S. 2014.** Moderated estimation of fold change and dispersion for  
997 RNA-seq data with DESeq2. *Genome Biology* **15**: 550.
- 998 **Lowe WH, McPeck MA. 2014.** Is dispersal neutral? *Trends in Ecology & Evolution* **29**: 444–  
999 450.
- 1000 **Man in 't Veld WA, Man in 't W, Karin C H, Brouwer H, de Cock AWAM. 2011.** *Phytophthora*  
1001 *geminis* sp. nov., a new species isolated from the halophilic plant *Zostera marina* in the  
1002 Netherlands. *Fungal Biology* **115**: 724–732.
- 1003 **Man in 't Veld WA, Man in 't W, Karin C H, van Rijswijk PCJ, Meffert JP, Boer E,**  
1004 **Westenberg M, van der Heide T, Govers LL. 2019.** Multiple *Halophytophthora* spp. and  
1005 *Phytophthora* spp. including *P. geminis*, *P. inundata* and *P. chesapeakeensis* sp. nov. isolated  
1006 from the seagrass *Zostera marina* in the Northern hemisphere. *European Journal of Plant*  
1007 *Pathology* **153**: 341–357.
- 1008 **Martin M. 2011.** Cutadapt removes adapter sequences from high-throughput sequencing reads.  
1009 *EMBnet journal* **17**: 10.
- 1010 **Mata JL, Cebrián J. 2013.** Fungal endophytes of the seagrasses *Halodule wrightii* and  
1011 *Thalassia testudinum* in the north-central Gulf of Mexico. *Botanica Marina* **56**.
- 1012 **McMurdie PJ, Holmes S. 2013.** phyloseq: An R package for reproducible interactive analysis

- 1013 and graphics of microbiome census data. *PLoS ONE* **8**: e61217.
- 1014 **McMurdie PJ, Holmes S. 2014.** Waste Not, Want Not: Why Rarefying Microbiome Data Is  
1015 Inadmissible. *PLoS Computational Biology* **10**: e1003531.
- 1016 **Meiser A, Bálint M, Schmitt I. 2014.** Meta-analysis of deep-sequenced fungal communities  
1017 indicates limited taxon sharing between studies and the presence of biogeographic patterns.  
1018 *The New phytologist* **201**: 623–635.
- 1019 **Menkis A, Burokienė D, Gaitnieks T, Uotila A, Johannesson H, Rosling A, Finlay RD,**  
1020 **Stenlid J, Vasaitis R. 2012.** Occurrence and impact of the root-rot biocontrol agent *Phlebiopsis*  
1021 *gigantea* on soil fungal communities in *Picea abies* forests of northern Europe. *FEMS*  
1022 *Microbiology Ecology* **81**: 438–445.
- 1023 **Morales SE, Biswas A, Herndl GJ, Baltar F. 2019.** Global Structuring of Phylogenetic and  
1024 Functional Diversity of Pelagic Fungi by Depth and Temperature. *Frontiers in Marine Science* **6**.
- 1025 **Morella NM, Weng FC-H, Joubert PM, Metcalf CJE, Lindow S, Koskella B. 2020.**  
1026 Successive passaging of a plant-associated microbiome reveals robust habitat and host  
1027 genotype-dependent selection. *Proceedings of the National Academy of Sciences of the United*  
1028 *States of America* **117**: 1148–1159.
- 1029 **Morgan M, Anders S, Lawrence M, Aboyoun P, Pagès H, Gentleman R. 2009.** ShortRead: a  
1030 Bioconductor package for input, quality assessment and exploration of high-throughput  
1031 sequence data. *Bioinformatics* **25**: 2607–2608.
- 1032 **Muñiz-Salazar R, Talbot SL, Sage GK, Ward DH, Cabello-Pasini A. 2005.** Population genetic  
1033 structure of annual and perennial populations of *Zostera marina* L. along the Pacific coast of  
1034 Baja California and the Gulf of California. *Molecular Ecology* **14**: 711–722.
- 1035 **Nagano Y, Miura T, Nishi S, Lima AO, Nakayama C, Pellizari VH, Fujikura K. 2017.** Fungal  
1036 diversity in deep-sea sediments associated with asphalt seeps at the Sao Paulo Plateau. *Deep*  
1037 *Sea Research Part II: Topical Studies in Oceanography* **146**: 59–67.
- 1038 **Neuwirth E. 2014.** RColorBrewer: ColorBrewer Palettes.
- 1039 **Nguyen NH, Song Z, Bates ST, Branco S, Tedersoo L, Menke J, Schilling JS, Kennedy**  
1040 **PG. 2016.** FUNGuild: An open annotation tool for parsing fungal community datasets by  
1041 ecological guild. *Fungal Ecology* **20**: 241–248.
- 1042 **Ogle DH, Wheeler P, Dinno A. 2020.** FSA: Fisheries Stock Analysis.
- 1043 **Oksanen J, Blanchet FG, Friendly M, Kindt R, Legendre P, McGlenn D, Minchin PR, O'Hara**  
1044 **RB, Simpson GL, Solymos P, et al. 2019.** vegan: Community Ecology Package.
- 1045 **Olsen JL, Stam WT, Coyer JA, Reusch TBH, Billingham M, Boström C, Calvert E, Christie**  
1046 **H, Granger S, la Lumière R, et al. 2004.** North Atlantic phylogeography and large-scale  
1047 population differentiation of the seagrass *Zostera marina* L. *Molecular ecology* **13**: 1923–1941.
- 1048 **Orsi W, Biddle JF, Edgcomb V. 2013.** Deep sequencing of subseafloor eukaryotic rRNA  
1049 reveals active Fungi across marine subsurface provinces. *PloS one* **8**: e56335.
- 1050 **Ort BS, Cohen CS, Boyer KE, Wyllie-Echeverria S. 2012.** Population Structure and Genetic

- 1051 Diversity among Eelgrass (*Zostera marina*) Beds and Depths in San Francisco Bay. *Journal of*  
1052 *Heredity* **103**: 533–546.
- 1053 **Orth RJ, Carruthers TJB, Dennison WC, Duarte CM, Fourqurean JW, Heck KL, Randall**  
1054 **Hughes A, Kendrick GA, Judson Kenworthy W, Olyarnik S, et al. 2006.** A Global Crisis for  
1055 Seagrass Ecosystems. *BioScience* **56**: 987.
- 1056 **Pauvert C, Buée M, Laval V, Edel-Hermann V, Fauchery L, Gautier A, Lesur I, Vallance J,**  
1057 **Vacher C. 2019.** Bioinformatics matters: The accuracy of plant and soil fungal community data  
1058 is highly dependent on the metabarcoding pipeline. *Fungal Ecology* **41**: 23–33.
- 1059 **Peay KG, Bidartondo MI, Arnold AE. 2010.** Not every fungus is everywhere: scaling to the  
1060 biogeography of fungal-plant interactions across roots, shoots and ecosystems. *The New*  
1061 *phytologist* **185**: 878–882.
- 1062 **Peay KG, Kennedy PG, Talbot JM. 2016.** Dimensions of biodiversity in the Earth mycobiome.  
1063 *Nature reviews. Microbiology* **14**: 434–447.
- 1064 **Pedersen TL. 2020.** patchwork: The Composer of Plots.
- 1065 **Petersen L-E, Marnier M, Labes A, Tasmir D. 2019.** Rapid Metabolome and Bioactivity  
1066 Profiling of Fungi Associated with the Leaf and Rhizosphere of the Baltic Seagrass *Zostera*  
1067 *marina*. *Marine Drugs* **17**: 419.
- 1068 **Picard KT. 2017.** Coastal marine habitats harbor novel early-diverging fungal diversity. *Fungal*  
1069 *Ecology* **25**: 1–13.
- 1070 **Quast C, Pruesse E, Yilmaz P, Gerken J, Schweer T, Yarza P, Peplies J, Glöckner FO.**  
1071 **2013.** The SILVA ribosomal RNA gene database project: improved data processing and web-  
1072 based tools. *Nucleic acids research* **41**: D590–6.
- 1073 **Raghukumar S. 2017.** The Marine Environment and the Role of Fungi. *Fungi in Coastal and*  
1074 *Oceanic Marine Ecosystems*: 17–38.
- 1075 **Rao CR. 1997.** An Alternative to Correspondence Analysis Using Hellinger Distance.
- 1076 **Ricks KD, Koide RT. 2019.** The role of inoculum dispersal and plant species identity in the  
1077 assembly of leaf endophytic fungal communities. *PloS one* **14**: e0219832.
- 1078 **Risely A. 2020.** Applying the core microbiome to understand host–microbe systems. *Journal of*  
1079 *Animal Ecology* **89**: 1549–1558.
- 1080 **Ritchie ME, Phipson B, Wu D, Hu Y, Law CW, Shi W, Smyth GK. 2015.** limma powers  
1081 differential expression analyses for RNA-sequencing and microarray studies. *Nucleic Acids*  
1082 *Research* **43**: e47.
- 1083 **Robinson D, Hayes A. 2020.** broom: Convert Statistical Analysis Objects into Tidy Tibbles.
- 1084 **Rojas-Jimenez K, Rieck A, Wurzbacher C, Jürgens K, Labrenz M, Grossart H-P. 2019.** A  
1085 Salinity Threshold Separating Fungal Communities in the Baltic Sea. *Frontiers in microbiology*  
1086 **10**: 680.
- 1087 **Rosindell J, Hubbell SP, Etienne RS. 2011.** The unified neutral theory of biodiversity and

- 1088 biogeography at age ten. *Trends in ecology & evolution* **26**: 340–348.
- 1089 **Sakayaroj J, Preedanon S, Supaphon O, Jones EBG, Phongpaichit S. 2010.** Phylogenetic  
1090 diversity of endophyte assemblages associated with the tropical seagrass *Enhalus acoroides* in  
1091 Thailand. *Fungal Diversity* **42**: 27–45.
- 1092 **Salazar G. 2020.** EcolUtils: Utilities for community ecology analysis.
- 1093 **Sapkota R, Knorr K, Jørgensen LN, O’Hanlon KA, Nicolaisen M. 2015.** Host genotype is an  
1094 important determinant of the cereal phyllosphere mycobiome. *The New phytologist* **207**: 1134–  
1095 1144.
- 1096 **Sarkar D. 2008.** Lattice: Multivariate Data Visualization with R.
- 1097 **Schmidt VT, Smith KF, Melvin DW, Amaral-Zettler LA. 2015.** Community assembly of a  
1098 euryhaline fish microbiome during salinity acclimation. *Molecular ecology* **24**: 2537–2550.
- 1099 **Seto K, Degawa Y. 2015.** *Cyclopsomyces plurioperculatus*: a new genus and species of  
1100 Lobulomycetales (Chytridiomycota, Chytridiomycetes) from Japan. *Mycologia* **107**: 633–640.
- 1101 **Shade A, Stopnisek N. 2019.** Abundance-occupancy distributions to prioritize plant core  
1102 microbiome membership. *Current opinion in microbiology* **49**: 50–58.
- 1103 **Shoemaker G, Wyllie-Echeverria S. 2013.** Occurrence of rhizomal endophytes in three  
1104 temperate northeast pacific seagrasses. *Aquatic Botany* **111**: 71–73.
- 1105 **Simpson GL. 2019.** permute: Functions for Generating Restricted Permutations of Data.
- 1106 **Sloan WT, Woodcock S, Lunn M, Head IM, Curtis TP. 2007.** Modeling taxa-abundance  
1107 distributions in microbial communities using environmental sequence data. *Microbial ecology*  
1108 **53**: 443–455.
- 1109 **Sprockett D. 2020.** reltools: Microbiome Amplicon Analysis and Visualization.
- 1110 **Stoeck T, Bass D, Nebel M, Christen R, Jones MDM, Breiner H-W, Richards TA. 2010.**  
1111 Multiple marker parallel tag environmental DNA sequencing reveals a highly complex eukaryotic  
1112 community in marine anoxic water. *Molecular ecology* **19 Suppl 1**: 21–31.
- 1113 **Stopnisek N, Shade A.** Prioritizing persistent microbiome members in the common bean  
1114 rhizosphere: an integrated analysis of space, time, and plant genotype.
- 1115 **Sun F, Zhang X, Zhang Q, Liu F, Zhang J, Gong J. 2015.** Seagrass (*Zostera marina*)  
1116 Colonization Promotes the Accumulation of Diazotrophic Bacteria and Alters the Relative  
1117 Abundances of Specific Bacterial Lineages Involved in Benthic Carbon and Sulfur Cycling.  
1118 *Applied and environmental microbiology* **81**: 6901–6914.
- 1119 **Supaphon P, Phongpaichit S, Sakayaroj J, Rukachaisirikul V, Kobmoo N, Spatafora JW.**  
1120 **2017.** Phylogenetic community structure of fungal endophytes in seagrass species. *Botanica*  
1121 *Marina* **60**.
- 1122 **Talbot JM, Bruns TD, Taylor JW, Smith DP, Branco S, Glassman SI, Erlandson S, Vilgalys**  
1123 **R, Liao H-L, Smith ME, et al. 2014.** Endemism and functional convergence across the North  
1124 American soil mycobiome. *Proceedings of the National Academy of Sciences of the United*



- 1125 *States of America* **111**: 6341–6346.
- 1126 **Taylor JD, Cunliffe M. 2016.** Multi-year assessment of coastal planktonic fungi reveals  
1127 environmental drivers of diversity and abundance. *The ISME journal* **10**: 2118–2128.
- 1128 **Tedersoo L, Bahram M, Põlme S, Kõljalg U, Yorou NS, Wijesundera R, Villarreal Ruiz L,**  
1129 **Vasco-Palacios AM, Thu PQ, Suija A, et al. 2014.** Fungal biogeography. Global diversity and  
1130 geography of soil fungi. *Science* **346**: 1256688.
- 1131 **Therneau TM. 2020.** *A Package for Survival Analysis in R*.
- 1132 **Tisthammer KH, Cobian GM, Amend AS. 2016.** Global biogeography of marine fungi is  
1133 shaped by the environment. *Fungal Ecology* **19**: 39–46.
- 1134 **Trevathan-Tackett SM, Allnut TR, Sherman CDH, Richardson ME, Crowley TM, Macreadie**  
1135 **PI. 2020.** Spatial variation of bacterial and fungal communities of estuarine seagrass leaf  
1136 microbiomes. *Aquatic Microbial Ecology* **84**: 59–74.
- 1137 **Verster AJ, Borenstein E. 2018.** Competitive lottery-based assembly of selected clades in the  
1138 human gut microbiome. *Microbiome* **6**: 186.
- 1139 **Wainwright BJ, Bauman AG, Zahn GL, Todd PA, Huang D. 2019a.** Characterization of fungal  
1140 biodiversity and communities associated with the reef macroalga *Sargassum ilicifolium* reveals  
1141 fungal community differentiation according to geographic locality and algal structure. *Marine*  
1142 *Biodiversity* **49**: 2601–2608.
- 1143 **Wainwright BJ, Zahn GL, Arlyza IS, Amend AS. 2018.** Seagrass-associated fungal  
1144 communities follow Wallace’s line, but host genotype does not structure fungal community.  
1145 *Journal of Biogeography* **45**: 762–770.
- 1146 **Wainwright BJ, Zahn GL, Zushi J, Lee NLY, Ooi JLS, Lee JN, Huang D. 2019b.** Seagrass-  
1147 associated fungal communities show distance decay of similarity that has implications for  
1148 seagrass management and restoration. *Ecology and Evolution* **9**: 11288–11297.
- 1149 **Wang Q, Garrity GM, Tiedje JM, Cole JR. 2007.** Naive Bayesian classifier for rapid  
1150 assignment of rRNA sequences into the new bacterial taxonomy. *Applied and environmental*  
1151 *microbiology* **73**: 5261–5267.
- 1152 **Wang L, Tomas F, Mueller RS. 2020.** Nutrient enrichment increases size of *Zostera marina*  
1153 shoots and enriches for sulfur and nitrogen cycling bacteria in root-associated microbiomes.  
1154 *FEMS microbiology ecology* **96**.
- 1155 **White TJ, Bruns T, Lee S, Taylor J. 1990.** Amplification and direct sequencing of fungal  
1156 ribosomal RNA genes for phylogenetics. In: PCR protocols: a guide to methods and  
1157 applications. 315–322.
- 1158 **Wickham H. 2007.** Reshaping data with the reshape package. *Journal of Statistical Software*  
1159 **21**.
- 1160 **Wickham H. 2016.** ggplot2: Elegant Graphics for Data Analysis.
- 1161 **Wickham H, Averick M, Bryan J, Chang W, McGowan LD, François R, Golemund G,**  
1162 **Hayes A, Henry L, Hester J, et al. 2019.** Welcome to the tidyverse. *Journal of Open Source*

- 1163 *Software 4*: 1686.
- 1164 **Wickham H, Seidel D. 2020.** scales: Scale Functions for Visualization.
- 1165 **Wright DH. 1991.** Correlations Between Incidence and Abundance are Expected by Chance.  
1166 *Journal of Biogeography 18*: 463.
- 1167 **Xie Y. 2014.** knitr: A Comprehensive Tool for Reproducible Research in R (V Stodden, F Leisch,  
1168 and RD Peng, Eds.). *Implementing Reproducible Computational Research*.
- 1169 **Yarden O. 2014.** Fungal association with sessile marine invertebrates. *Frontiers in microbiology*  
1170 **5**: 228.
- 1171 **Yilmaz P, Parfrey LW, Yarza P, Gerken J, Pruesse E, Quast C, Schweer T, Peplies J,**  
1172 **Ludwig W, Glöckner FO. 2014.** The SILVA and 'All-species Living Tree Project (LTP)'  
1173 taxonomic frameworks. *Nucleic Acids Research 42*: D643–D648.
- 1174 **Yu G. 2020.** ggplotify: Convert Plot to 'grob' or 'ggplot' Object.
- 1175 **Zeileis A, Croissant Y. 2010.** Extended Model Formulas in R: Multiple Parts and Multiple  
1176 Responses. *Journal of Statistical Software 34*: 1–13.
- 1177 **Zhou J, Ning D. 2017.** Stochastic Community Assembly: Does It Matter in Microbial Ecology?  
1178 *Microbiology and molecular biology reviews: MMBR 81*.
- 1179 **Zuccaro A, Schoch CL, Spatafora JW, Kohlmeyer J, Draeger S, Mitchell JI. 2008.** Detection  
1180 and identification of fungi intimately associated with the brown seaweed *Fucus serratus*. *Applied*  
1181 *and environmental microbiology 74*: 931–941.
- 1182
- 1183
- 1184
- 1185
- 1186
- 1187
- 1188
- 1189
- 1190
- 1191
- 1192
- 1193
- 1194
- 1195
- 1196
- 1197
- 1198
- 1199
- 1200
- 1201

1202 **Figures and Tables:**

1203

1204 **Figure 1.** Within sample diversity varies across tissues. Boxplot visualizations of Shannon

1205 diversities for each sample type (leaf, root, sediment) based on (A) ITS2 region amplicon data

1206 and (B) 18S rRNA gene amplicon data.

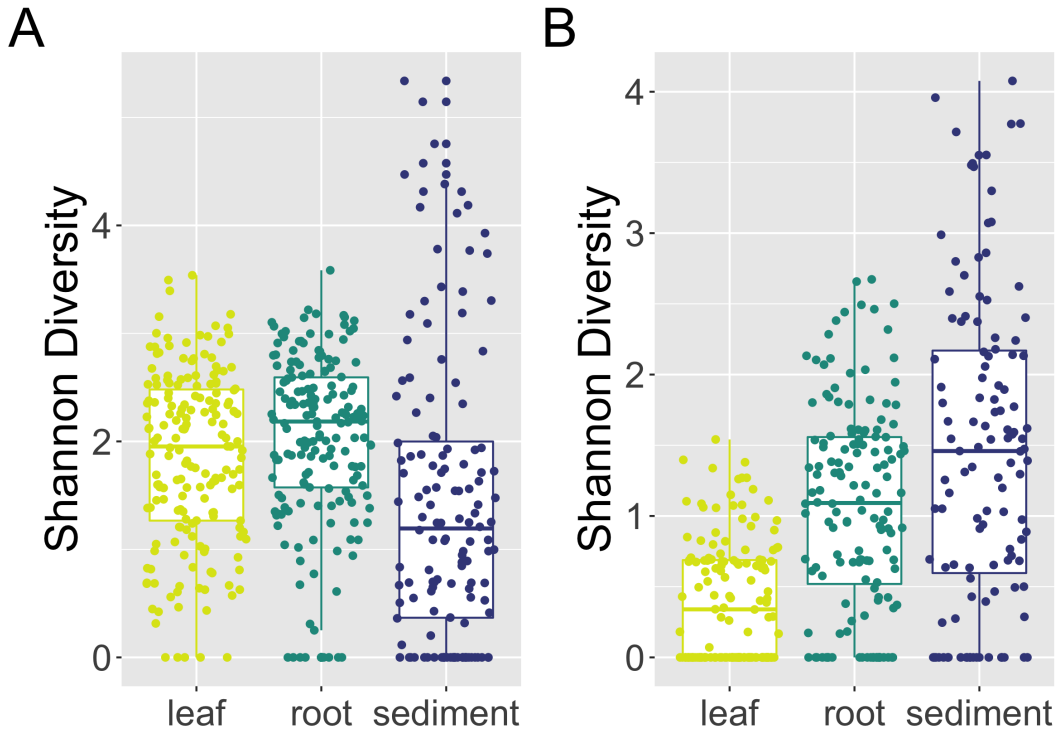

1207

1208

1209

1210

1211

1212

1213

1214

1215

1216 **Figure 2.** Community structure varies between tissues. Principal coordinates analysis (PCoA)  
1217 visualization of Hellinger distances of fungal communities associated with leaves, roots, and  
1218 sediment based on (A) ITS2 region amplicon data and (B) 18S rRNA gene amplicon data.  
1219 Points in the ordination are colored and represented by shapes based on sample type: leaf  
1220 (yellow circles), root (green triangles) or sediment (blue squares).

1221

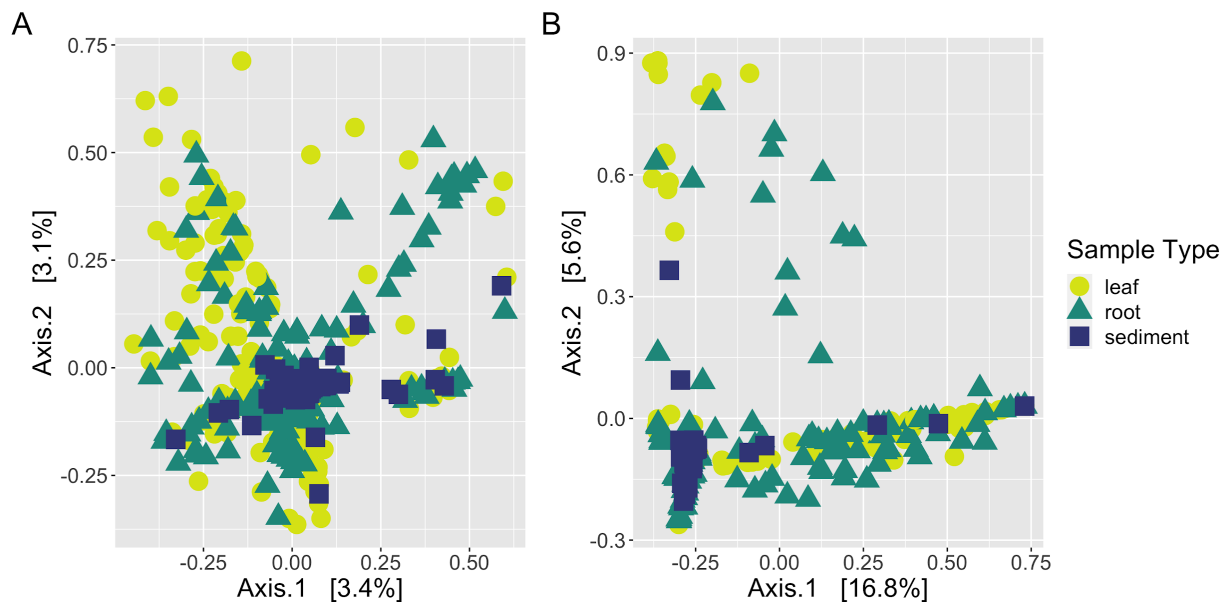

1222

1223

1224

1225

1226

1227

1228

1229

1230

1231

1232

1233 **Figure 3.** Mantel tests suggest a distance-decay relationship. Scatterplots depicting the weak,  
1234 but significant positive distance-decay relationship between leaf fungal community beta  
1235 diversity (Hellinger distance) using the ITS2 region amplicon data and geographical distance  
1236 (km) between sites from the (A) Pacific Ocean, and (B) Atlantic Ocean.  
1237

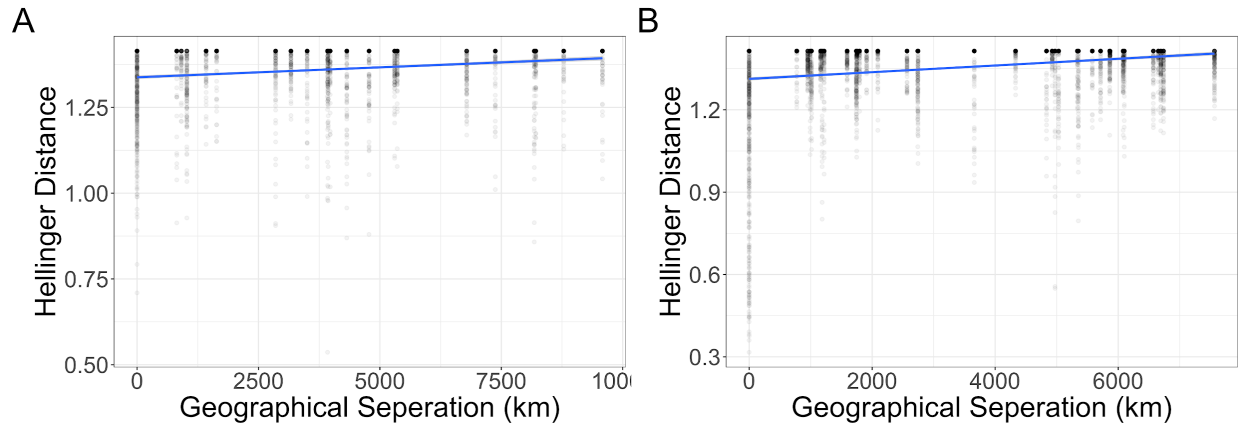

1238  
1239  
1240  
1241  
1242  
1243  
1244  
1245  
1246  
1247  
1248  
1249  
1250  
1251  
1252

1253 **Figure 4.** Overlap between predicted core mycobiomes of individual *Z. marina* tissues. Venn  
1254 diagrams representing shared core ASVs as defined by abundance-occupancy distributions for  
1255 each sample type (leaf, root, sediment) for (A) ITS2 region amplicon data, and (B) 18S rRNA  
1256 gene amplicon data.

1257

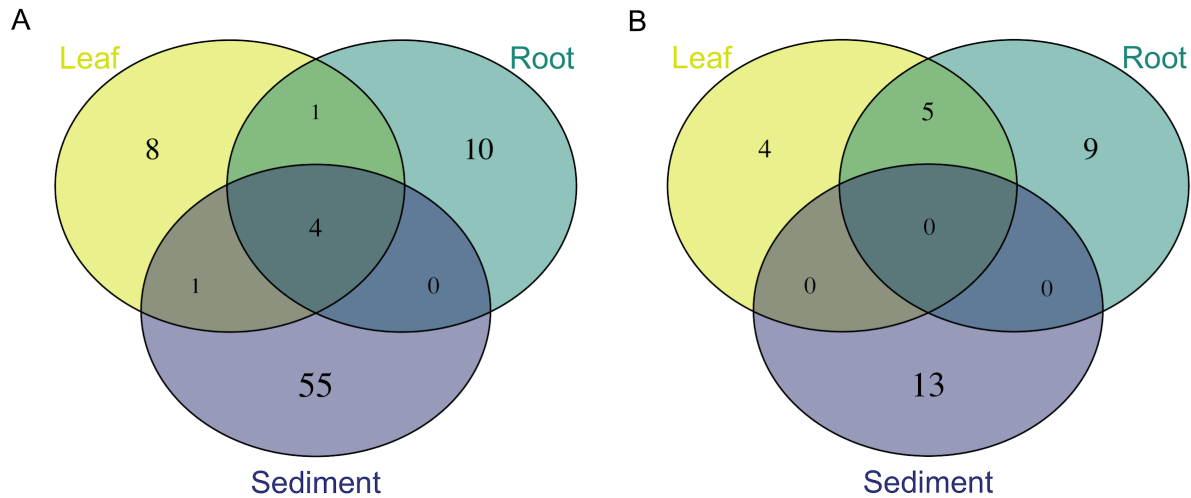

1258

1259

1260

1261

1262

1263

1264

1265

1266

1267

1268

1269

1270

1271 **Figure 5.** Abundance-occupancy distributions reveal core mycobiomes. Abundance-occupancy  
1272 distributions were used to define core members of the (A) leaf, (B) root and (C) sediment  
1273 mycobiomes for the ITS2 region amplicon data. Each point represents an ASV with predicted  
1274 core members indicated by a color (leaf = yellow, root = green, sediment = blue) and non-core  
1275 ASVs in white. Ranked ASVs were predicted to be in the core based on a final percent increase  
1276 of equal or greater than 10%. The solid line represents the fit of the neutral model, and the  
1277 dashed line is 95% confidence around the model prediction. ASVs above the neutral model are  
1278 predicted to be selected for by the environment (e.g. by the host plant, *Z. marina*), and those  
1279 below the model are predicted to be selected-against or dispersal-limited.

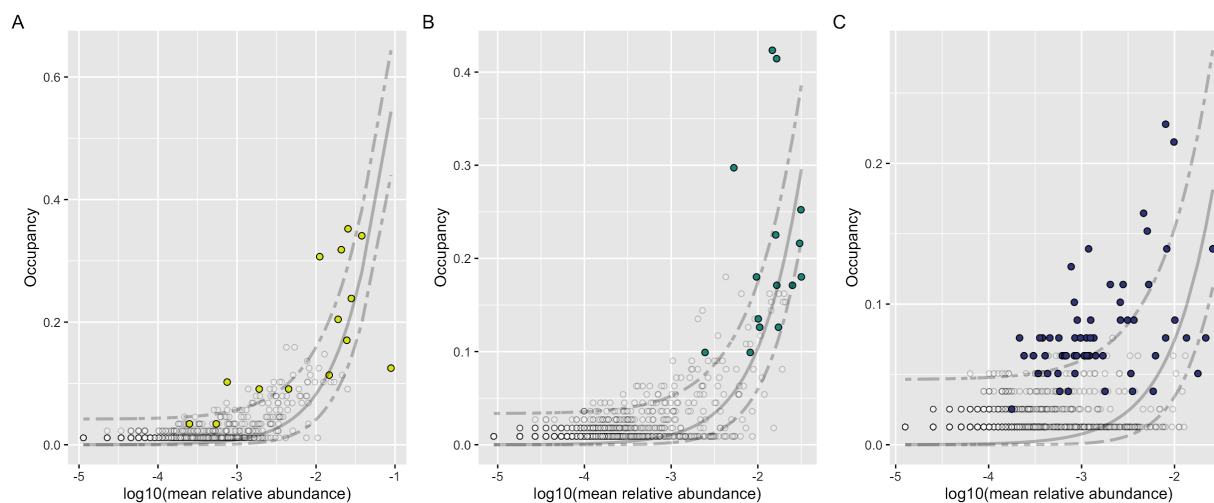

1280  
1281  
1282  
1283  
1284  
1285  
1286  
1287

1288 **Figure 6.** Example of differentially abundant neutrally selected core ASV. Here we show the  
1289 global distribution of ITS\_SV260, an ASV predicted to be a neutrally selected member of the  
1290 core mycobiomes of both leaves and roots and also differentially abundant between leaves and  
1291 sediment ( $p < 0.001$ ), and roots and sediment ( $p < 0.001$ ) using DESeq2. In (A) we plot the  
1292 mean relative abundance of ITS\_SV260 at each site on leaves on a global map, and in (B) we  
1293 plot the mean relative abundance of ITS\_SV260 on leaves, roots and sediment across sites,  
1294 with the standard error of the mean represented by error bars and bars colored by sample type.

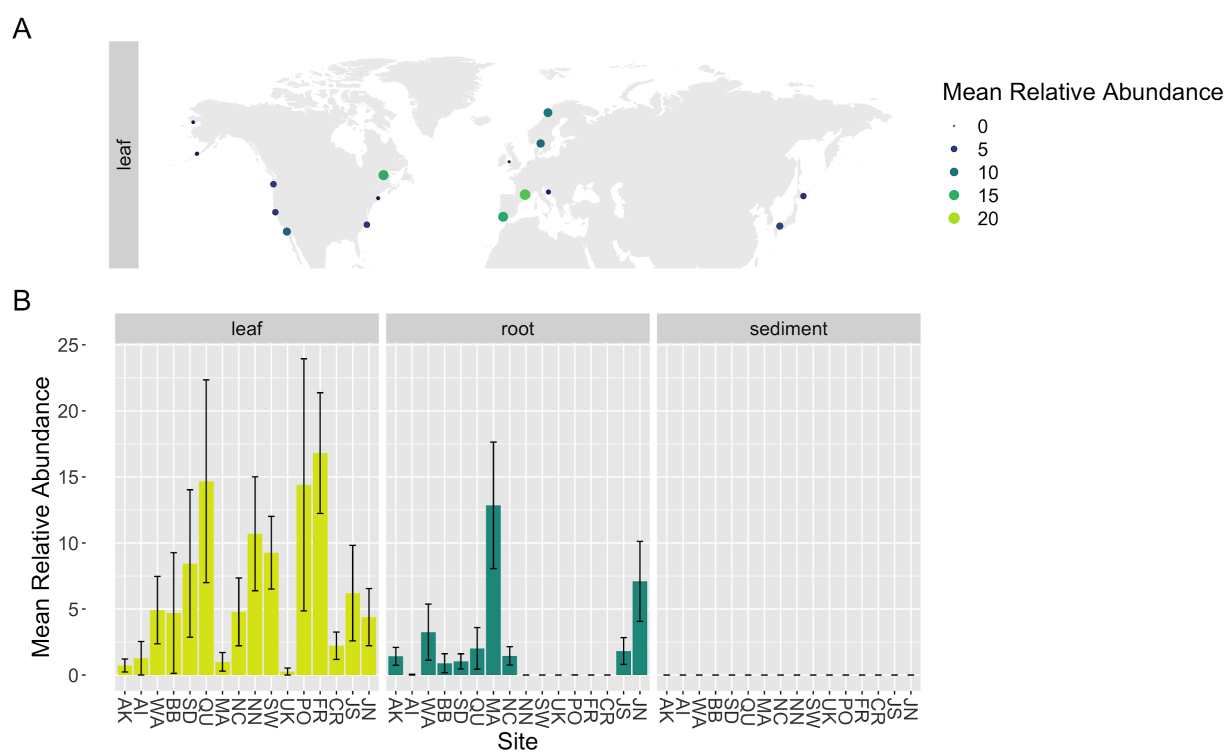

1295

1296

1297

1298

1299

1300

1301

1302



1303 **Figure 7.** Example of differentially abundant dispersal-limited core ASV. Here we show the  
1304 global distribution of ITS\_SV362, an ASV predicted to be dispersal-limited and a member of the  
1305 core mycobiomes of leaves and also differentially abundant between leaves and sediment ( $p <$   
1306 0.001), and roots and sediment ( $p < 0.001$ ) using DESeq2. In (A) we plot the mean relative  
1307 abundance of ITS\_SV362 at each site on leaves on a global map, and in (B) we plot the mean  
1308 relative abundance of ITS\_SV362 on leaves, roots and sediment across sites, with the standard  
1309 error of the mean represented by error bars and bars colored by sample type.

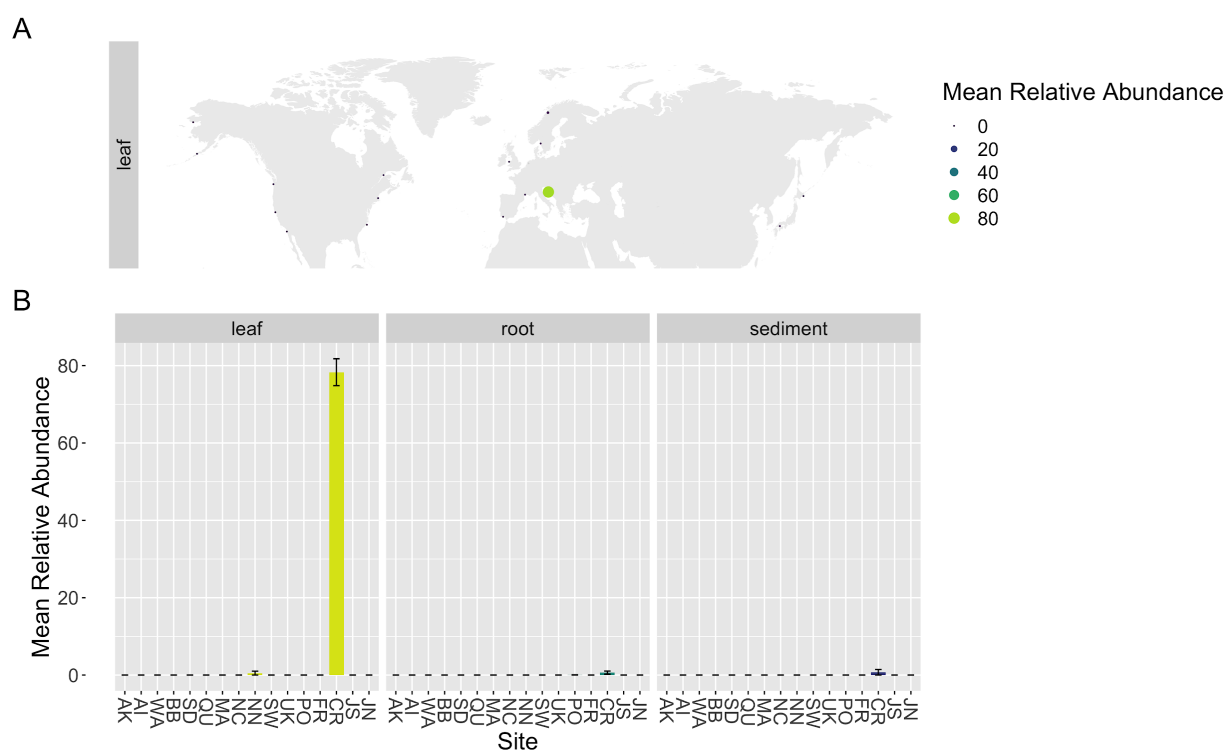

1310

1311

1312

1313

1314

1315

1316

1317

1318 **Table 1.** Predicted differentially abundant core ASVs. ASVs were ranked by abundance-  
 1319 occupancy distributions and then predicted to be in a core based on a final percent increase in  
 1320 beta-diversity of equal or greater than 10%. The Sloan neutral model was then applied to the  
 1321 abundance-occupancy distributions to identify ASVs that deviate such that ASVs above the  
 1322 neutral model are predicted to be selected for by the environment (e.g. by the host plant, *Z.*  
 1323 *marina*), and those below the model are predicted to be selected-against or dispersal-limited.  
 1324 Finally, DESeq2 was used to identify ASVs that were differentially abundant between pair-wise  
 1325 sample types (leaf, root, sediment). Here for each predicted core ASV that was also  
 1326 differentially abundant for at least one pairwise comparison, we report the ASV, the core it was  
 1327 predicted to be a member of (leaf, root or sediment), whether the ASV deviated from the neutral  
 1328 model (above, below or none), the significant pairwise differential abundance comparisons (e.g.  
 1329 root > sediment means that the ASV was in significantly higher abundance when associated  
 1330 with roots than with sediment), and the taxonomy of the ASV.  
 1331

| ASV       | Core prediction      | Neutral model deviations | Significant DESeq2 comparisons   | Taxonomy                         |
|-----------|----------------------|--------------------------|----------------------------------|----------------------------------|
| ITS_SV52  | leaf, root, sediment | above, above, none       | root > sediment                  | <i>Mycosphaerella tassiana</i>   |
| ITS_SV60  | root                 | below                    | leaf > sediment; root > sediment | Unclassified Sordariomycetes sp. |
| ITS_SV125 | root                 | none                     | root > sediment                  | Unclassified Ascomycota sp.      |
| ITS_SV234 | root                 | none                     | leaf > sediment; root > sediment | Unclassified Sordariomycetes sp. |

|                   |                |              |                                  |                                   |
|-------------------|----------------|--------------|----------------------------------|-----------------------------------|
| <b>ITS_SV260</b>  | leaf, root     | none, none   | leaf > sediment; root > sediment | <i>Saccharomyces paradoxus</i>    |
| <b>ITS_SV362</b>  | leaf           | below        | leaf > sediment; root > sediment | <i>Lobulomyces</i> sp.            |
| <b>ITS_SV426</b>  | leaf, sediment | none, none   | leaf > sediment; root > sediment | <i>Saccharomyces</i> sp.          |
| <b>ITS_SV497</b>  | root           | below        | leaf > sediment; root > sediment | Unclassified Sordariomycetes sp.  |
| <b>ITS_SV679</b>  | sediment       | above        | root > leaf; root > leaf         | <i>Pseudeurotium bakeri</i>       |
| <b>ITS_SV1045</b> | root           | above        | leaf > sediment; root > sediment | <i>Hortaea werneckii</i>          |
| <b>18S_SV756</b>  | leaf, root     | none, none   | root > sediment                  | Unclassified Chytridiomycetes sp. |
| <b>18S_SV928</b>  | leaf, root     | above, above | leaf > sediment; root > sediment | <i>Saccharomyces</i> sp.          |
| <b>18S_SV968</b>  | leaf           | none         | leaf > sediment; root > sediment | Unclassified Lobulomycetaceae sp. |
| <b>18S_SV1977</b> | root           | none         | root > sediment                  | <i>Chytridium</i> sp.             |

1332

1333

1334

1335

1336
